# Supplementary material for: Insight Into the Diversity and Possible Role of Plasmids in the Adaptation of Psychrotolerant and Metalotolerant Arthrobacter spp. to Extreme Antarctic Environments
Source: Front Microbiol. 2018 Dec 18;9:3144. doi: 10.3389/fmicb.2018.03144 (PMC6305408; doi:10.3389/fmicb.2018.03144)
Supplement: Supplementary file 6 [file Table_6.pdf]

## Supplementary Material

# Insight into the Diversity and Possible Role of Plasmids in the Adaptation of Psychrotolerant and Metalotolerant *Arthrobacter* spp. to Extreme Antarctic Environments

**Krzysztof Romaniuk, Piotr Golec, Lukasz Dziewit\***

\* **Correspondence:** Dr. Lukasz Dziewit: ldziewit@biol.uw.edu.pl

**TABLE S6.** Distribution of the genetic modules carried by the ANT plasmids in various *Arthrobacter* genomes.

[illegible]

[illegible]
