# Supplementary material for: Insight Into the Diversity and Possible Role of Plasmids in the Adaptation of Psychrotolerant and Metalotolerant Arthrobacter spp. to Extreme Antarctic Environments
Source: PubMed Central journal article supplement (PMC6305408; doi:10.3389/fmicb.2018.03144), 2018-12-18
Supplement: Table_1.pdf [file Table_1.pdf]

### Supplementary Material

## Insight into the Diversity and Possible Role of Plasmids in the Adaptation of Psychrotolerant and Metalotolerant *Arthrobacter* spp. to Extreme Antarctic Environments

Krzysztof Romaniuk, Piotr Golec, Lukasz Dziewit\*

\* Correspondence: Dr. Lukasz Dziewit: ldziewit@biol.uw.edu.pl

**TABLE S1.** Plasmids and PCR primers used in this study.

| Plasmid              | Characteristics                                                                                                                         | Reference or source                |
|----------------------|-----------------------------------------------------------------------------------------------------------------------------------------|------------------------------------|
| pBBR1 MCS-2          | Km <sup>r</sup> ; 5.1 kb; <i>ori</i> pBBR1; <i>Mob</i> <sup>+</sup> ; <i>oriT</i> RK2; <i>lacZα</i> ; MCS                               | (Kovach et al., 1994)              |
| pBBR-LAM             | Km <sup>r</sup> ; 6.9 kb; pBBR1 MCS-2 derivative carrying PCR-amplified LAM module of the pA8H1 plasmid cloned within <i>Sall</i> site  | This study                         |
| pBBR-TER             | Km <sup>r</sup> ; 7.8 kb; pBBR1 MCS-2 derivative carrying PCR-amplified TER module of the pA40H2 plasmid cloned within <i>SacI</i> site | This study                         |
| pBBR-UMU             | Km <sup>r</sup> ; 9.3 kb; pBBR1 MCS-2 derivative carrying PCR-amplified UMU module of the pA58H3 plasmid cloned within <i>KpnI</i> site | This study                         |
| Primer name          | Primer sequence*                                                                                                                        | Coordinates in appropriate plasmid |
| fLAM8H1<br>rLAM8H1   | 5'- <u>ACTGTCGACT</u> CCCCGCAGAAGCCCAAATC -3'<br>5'- <u>TCCGTCGACCC</u> GGTAATCGTCCTGTCCAAC -3'                                         | pA8H1<br>9,455 – 11,230            |
| fTER40H2<br>rTER40H2 | 5'- <u>TGCGCGAGCTCT</u> CTCGGCATCCACGTTGATCGG -3'<br>5'- <u>GGCCGAGCTCC</u> GTCTGCTGTTTCAGTGCCTTC -3'                                   | pA40H2<br>6,103 – 8,787            |
| fUMU58H3<br>rUMU58H3 | 5'- <u>TACGGTACCCT</u> CGTTCCGTTACTACTC -3'<br>5'- <u>CCAGGTACCA</u> AAGATGGCTCTCAGGAAG -3'                                             | pA58H3<br>92 – 4,201               |

\* Sequences shown in the 5' to 3' orientation. Sequences of the restriction sites were underlined.

### References

Kovach, M.E., Phillips, R.W., Elzer, P.H., Roop, R.M., 2nd, and Peterson, K.M. (1994). pBBR1MCS: a broad-host-range cloning vector. *BioTechniques* 16, 800-802.
