# Supplementary material for: Insight Into the Diversity and Possible Role of Plasmids in the Adaptation of Psychrotolerant and Metalotolerant Arthrobacter spp. to Extreme Antarctic Environments
Source: PubMed Central journal article supplement (PMC6305408; doi:10.3389/fmicb.2018.03144), 2018-12-18
Supplement: Table_2.pdf [file Table_2.pdf]

### *Supplementary Material*

## **Insight into the Diversity and Possible Role of Plasmids in the Adaptation of Psychrotolerant and Metalotolerant *Arthrobacter* spp. to Extreme Antarctic Environments**

**Krzysztof Romaniuk, Piotr Golec, Lukasz Dziewit\***

\* Correspondence: Dr. Lukasz Dziewit: ldziewit@biol.uw.edu.pl

**TABLE S2.** Summarization of the sequencing data for the ANT plasmids.

| Plasmid name | GenBank accession number | Contigs  | Number of reads | Covrage |
|--------------|--------------------------|----------|-----------------|---------|
| pA2H1        | MH067968                 | contig 1 | 18,701          | 630.9   |
|              |                          | contig 2 | 571             | 590.1   |
| pA2H2        | MH067969                 | contig 1 | 10,464          | 72.8    |
|              |                          | contig 2 | 11,867          | 85.2    |
| pA8H1        | MH067977                 | contig 1 | 417             | 11.3    |
|              |                          | contig 2 | 743             | 11.1    |
|              |                          | contig 3 | 332             | 12.2    |
|              |                          | contig 4 | 291             | 11.6    |
|              |                          | contig 5 | 174             | 13.1    |
| pA19BH1      | MH067967                 | contig 1 | 6,634           | 25.5    |
| pA40H1       | MH067970                 | contig 1 | 18,059          | 56.6    |
| pA40H2       | MH067971                 | contig 1 | 9,366           | 26.2    |
| pA44BH1      | MH067972                 | contig 1 | 3,375           | 21.5    |
| pA48BH1      | MH067973                 | contig 1 | 809             | 8.1     |
|              |                          | contig 2 | 532             | 9.2     |
| pA58H1       | MH067974                 | contig 1 | 22,900          | 162.7   |
| pA58H2       | MH067975                 | contig 1 | 7,627           | 24.3    |
| pA58H3       | MH067976                 | contig 1 | 5,677           | 15.7    |

<sup>a</sup> Sequences shown in the 5' to 3' orientation.
