# Supplementary material for: Insight Into the Diversity and Possible Role of Plasmids in the Adaptation of Psychrotolerant and Metalotolerant Arthrobacter spp. to Extreme Antarctic Environments
Source: PubMed Central journal article supplement (PMC6305408; doi:10.3389/fmicb.2018.03144), 2018-12-18
Supplement: Table_3.pdf [file Table_3.pdf]

## Supplementary Material

# Insight into the Diversity and Possible Role of Plasmids in the Adaptation of Psychrotolerant and Metalotolerant *Arthrobacter* spp. to Extreme Antarctic Environments

Krzysztof Romaniuk, Piotr Golec, Lukasz Dziewit\*

\* Correspondence: Dr. Lukasz Dziewit: ldziewit@biol.uw.edu.pl

**TABLE S3.** Genes located within the *Arthrobacter* spp. plasmids described in this study.

| Gene name         | Coding region (bp) | Orientation | Protein size (aa) | Possible function           | Best BLAST hits          |                                         |                       |
|-------------------|--------------------|-------------|-------------------|-----------------------------|--------------------------|-----------------------------------------|-----------------------|
|                   |                    |             |                   |                             | Percentage identity (aa) | Organism                                | GenBank accession no. |
| <b>pA2H1</b>      |                    |             |                   |                             |                          |                                         |                       |
| <i>pA2H1_p...</i> |                    |             |                   |                             |                          |                                         |                       |
| 01                | 263-1171           | →           | 302               | replication protein         | 277/306 (91%)            | <i>Glutamicibacter</i> sp. BW77         | WP_096254262          |
| 02                | 1161-1412          | →           | 83                | replicase / regulator       | 79/83 (95%)              | <i>Actinobacteria</i>                   | WP_078617992          |
| 03                | 1703-2101          | →           | 132               | Ars family regulator        | 132/132 (100%)           | <i>Actinobacteria</i>                   | WP_048896403          |
| 04                | 2098-2976          | →           | 292               | membrane permease           | 288/292 (99%)            | <i>Kocuria salsicia</i>                 | WP_055083813          |
| 05                | 3260-4246          | →           | 328               | transposase of IS481 family | 328/328 (100%)           | <i>Mycobacterium conceptionense</i>     | WP_065062263          |
| 06                | 4708-5472          | →           | 254               | preprotein translocase      | 132/201 (66%)            | <i>Microbacterium aurum</i>             | WP_076690377          |
| 07                | 5669-6577          | →           | 302               | hypothetical protein        | 196/303 (65%)            | <i>Actinotalea ferrariae</i>            | WP_034220959          |
| 08                | 7574-6828          | ←           | 248               | relaxase                    | 194/250 (78%)            | <i>Glutamicibacter halophytocola</i>    | WP_060703571          |
| 09                | 8044-7571          | ←           | 157               | mobilization protein C      | 127/161 (79%)            | <i>Glutamicibacter halophytocola</i>    | WP_060703570          |
| <b>pA2H2</b>      |                    |             |                   |                             |                          |                                         |                       |
| <i>pA2H2_p...</i> |                    |             |                   |                             |                          |                                         |                       |
| 01                | 414-1721           | →           | 435               | partitioning protein ParB   | 220/440 (50%)            | <i>Arthrobacter</i> sp. SRS-W-1-2016    | WP_078106487          |
| 02                | 2376-2696          | →           | 106               | hypothetical protein        | 27/86 (31%)              | <i>Arthrobacter nitrophenolicus</i>     | WP_009359328          |
| 03                | 3726-4715          | →           | 329               | hypothetical protein        | 208/329 (63%)            | <i>Paeniglutamicibacter antarcticus</i> | WP_084382566          |
| 04                | 4809-5219          | →           | 136               | hypothetical protein        | 99/123 (80%)             | <i>Paeniglutamicibacter antarcticus</i> | WP_068738522          |

|    |             |   |      |                                                  |                |                                             |              |
|----|-------------|---|------|--------------------------------------------------|----------------|---------------------------------------------|--------------|
| 05 | 5226-5630   | → | 134  | hypothetical protein                             | 99/115 (86%)   | <i>Paeniglutamicibacter antarcticus</i>     | WP_068738520 |
| 06 | 5633-5929   | → | 98   | hypothetical protein                             | 53/100 (53%)   | <i>Paeniglutamicibacter antarcticus</i>     | WP_068738518 |
| 07 | 6229-5933   | ← | 98   | hypothetical protein                             | 31/76 (41%)    | <i>Sinomonas mesophila</i>                  | WP_077490866 |
| 08 | 6594-6848   | → | 84   | glutaredoxin NrdH                                | 76/84 (90%)    | <i>Paeniglutamicibacter antarcticus</i>     | WP_068738516 |
| 09 | 7238-7642   | → | 134  | hypothetical protein                             | 78/132 (59%)   | <i>Glutamicibacter arilaitensis Re117</i>   | CBT77183     |
| 10 | 9000-8161   | ← | 279  | transposase OrfB, IS3 family, IS150 group        | 226/279 (81%)  | <i>Arthrobacter alpinus</i>                 | WP_062008556 |
| 11 | 9503-9012   | ← | 163  | transposase OrfA, IS3 family, IS150 group        | 112/163 (69%)  | <i>Arthrobacter alpinus</i>                 | WP_062005577 |
| 12 | 10716-9748  | ← | 322  | SulP family inorganic anion transporter, partial | 294/318 (92%)  | <i>Arthrobacter sp. UCD-GKA</i>             | WP_071214384 |
| 13 | 10970-11878 | → | 302  | transposase TniB, Tn3 family                     | 222/301 (74%)  | <i>Vitreoscilla filiformis</i>              | WP_089416951 |
| 14 | 11875-12987 | → | 370  | transposase TniQ, Tn3 family                     | 147/335 (44%)  | <i>Delftia tsuruhatensis</i>                | WP_061287697 |
| 15 | 13417-14055 | → | 212  | transposon invertase/resolvase TniR              | 185/203 (91%)  | <i>Arthrobacter sp. U41</i>                 | WP_069952892 |
| 16 | 14303-14983 | → | 226  | ABC lipoprotein transporter, ATP-binding         | 173/226 (77%)  | <i>Microbacterium sp. CH12i</i>             | KDA04992     |
| 17 | 14980-16278 | → | 432  | ABC-type permease                                | 306/433 (71%)  | <i>Microbacterium sp. CH12i</i>             | WP_036280764 |
| 18 | 16290-16928 | → | 212  | transcriptional regulator, TetR family           | 113/212 (53%)  | <i>Leucobacter celer</i>                    | WP_083451407 |
| 19 | 17470-17120 | ← | 116  | transcriptional regulator, MarR family, partial  | 50/98 (51%)    | <i>Arthrobacter nitrophenolicus</i>         | WP_009356916 |
| 20 | 20265-17731 | ← | 844  | RND transporter, membrane protein YdfJ           | 774/822 (94%)  | <i>Arthrobacter subterraneus</i>            | WP_090588210 |
| 21 | 20925-20296 | ← | 209  | transcriptional regulator, TetR family           | 193/208 (93%)  | <i>Pseudarthrobacter phenanthrenivorans</i> | WP_013602978 |
| 22 | 22611-20986 | ← | 541  | drug resistance transporter                      | 472/541 (87%)  | <i>Arthrobacter sp. Leaf69</i>              | WP_056426022 |
| 23 | 23234-22608 | ← | 208  | transcriptional regulator, TetR family           | 136/207 (66%)  | <i>Arthrobacter sp. I3</i>                  | WP_052355037 |
| 24 | 24119-24730 | → | 203  | invertase/recombinase of TE                      | 186/194 (96%)  | <i>Arthrobacter sp. YC-RL1</i>              | WP_047118360 |
| 25 | 24737-26197 | → | 486  | transposase of ISNCY family                      | 377/482 (78%)  | <i>Brevibacterium yomogidense</i>           | WP_087005899 |
| 26 | 26172-27077 | → | 301  | ATP-binding protein of TE                        | 238/301 (79%)  | <i>Brevibacterium yomogidense</i>           | WP_087005896 |
| 27 | 27229-27825 | → | 198  | invertase                                        | 122/184 (66%)  | <i>Arthrobacter sp. H20</i>                 | WP_026551421 |
| 28 | 27860-28153 | → | 97   | hypothetical protein                             | 33/93 (35%)    | <i>Arthrobacter sp. KI72</i>                | WP_079941698 |
| 29 | 28166-28642 | → | 158  | hypothetical protein                             | 93/157 (59%)   | <i>Arthrobacter sp. Leaf337</i>             | WP_055805228 |
| 30 | 29004-28639 | ← | 121  | hypothetical protein                             | 60/120 (50%)   | <i>Arthrobacter sp. Rue61a</i>              | WP_014923458 |
| 31 | 29406-33911 | → | 1501 | conjugal transfer protein TraA                   | 911/1466 (62%) | <i>Arthrobacter sp. Rue61a</i>              | WP_014923459 |
| 32 | 34017-34769 | → | 250  | hypothetical protein                             | 115/215 (53%)  | <i>Mycobacterium abscessus</i>              | WP_032691426 |
| 33 | 35843-34860 | ← | 327  | hypothetical protein                             | 232/326 (71%)  | <i>Paeniglutamicibacter antarcticus</i>     | WP_068731261 |
| 34 | 36866-36363 | ← | 167  | hypothetical protein                             | 148/172 (86%)  | <i>Arthrobacter sp. W1</i>                  | KWR70626     |
| 35 | 38002-36866 | ← | 378  | peptidase M23                                    | 256/340 (75%)  | <i>Paeniglutamicibacter antarcticus</i>     | WP_068735610 |
| 36 | 38717-37995 | ← | 240  | hypothetical protein                             | 97/167 (58%)   | <i>Arthrobacter sp. KI72</i>                | WP_079941686 |
| 37 | 40582-38714 | ← | 622  | conjugal transfer protein TraG                   | 374/592 (63%)  | <i>Arthrobacter sp. ZXY-2</i>               | WP_071416994 |
| 38 | 42046-40604 | ← | 480  | conjugal transfer ATPase                         | 331/489 (68%)  | <i>Arthrobacter sp. Hiyo1</i>               | WP_059390189 |
| 39 | 43788-42163 | ← | 541  | hypothetical protein                             | 343/541 (63%)  | <i>Arthrobacter sp. Hiyo1</i>               | WP_059390188 |
| 40 | 45535-43979 | ← | 518  | hypothetical protein                             | 262/504 (52%)  | <i>Arthrobacter sp. KI72</i>                | WP_079941690 |
| 41 | 46247-45582 | ← | 221  | hypothetical protein                             | 77/219 (35%)   | <i>Arthrobacter sp. Hiyo1</i>               | WP_059390186 |

|    |             |   |     |                                            |                |                                                |              |
|----|-------------|---|-----|--------------------------------------------|----------------|------------------------------------------------|--------------|
| 42 | 46612-46250 | ← | 120 | hypothetical protein                       | 65/120 (54%)   | <i>Arthrobacter sp. ZXY-2</i>                  | AOY74439     |
| 43 | 47763-46609 | ← | 384 | hypothetical protein                       | 213/379 (56%)  | <i>Arthrobacter sp. Hiyol</i>                  | WP_059390184 |
| 44 | 47958-48251 | → | 97  | transcriptional regulator, ArsR family     | 69/96 (72%)    | <i>Arthrobacter sp. AK-1</i>                   | WP_012311513 |
| 45 | 48373-49104 | → | 243 | hypothetical protein                       | 105/243 (43%)  | <i>Arthrobacter saudiensis</i>                 | CEA07078     |
| 46 | 49104-49832 | → | 242 | hypothetical protein                       | 112/240 (47%)  | <i>Tersicoccus sp. Bi-70</i>                   | WP_076695439 |
| 47 | 49906-50136 | → | 76  | hypothetical protein                       | 47/71 (66%)    | <i>Glutamicibacter sp. BW80</i>                | WP_096289390 |
| 48 | 50289-51716 | → | 475 | hypothetical protein                       | 197/367 (54%)  | <i>Glutamicibacter sp. BW77</i>                | WP_096253930 |
| 49 | 51902-52672 | → | 256 | partitioning protein ParA                  | 182/256 (71%)  | <i>Paeniglutamicibacter antarcticus</i>        | WP_068738528 |
| 50 | 52669-52995 | → | 117 | partitioning protein ParB                  | 38/106 (36%)   | <i>Arthrobacter subterraneus</i>               | SDI70605     |
| 51 | 53459-53893 | → | 144 | DNA polymerase V subunit UmuD              | 136/143 (95%)  | <i>Paeniglutamicibacter gangotriensis</i>      | WP_007273049 |
| 52 | 54048-55169 | → | 373 | tyrosine recombinase XerC                  | 372/373 (99%)  | <i>Paeniglutamicibacter gangotriensis</i>      | WP_007273086 |
| 53 | 55166-55516 | → | 116 | transcriptional regulator, XRE family      | 116/116 (100%) | <i>Paeniglutamicibacter gangotriensis</i>      | WP_007273085 |
| 54 | 55506-57992 | → | 828 | site-specific recombinase XerD             | 827/828 (99%)  | <i>Paeniglutamicibacter gangotriensis Lz1y</i> | EMQ96799     |
| 55 | 58251-59273 | → | 340 | tellurium resistance membrane protein TerC | 340/340 (100%) | <i>Paeniglutamicibacter gangotriensis</i>      | WP_007273083 |
| 56 | 59270-60103 | → | 277 | cation-transporting ATPase                 | 277/277 (100%) | <i>Paeniglutamicibacter gangotriensis</i>      | WP_007273082 |
| 57 | 60300-60605 | → | 101 | transcription termination factor Rho       | 101/101 (100%) | <i>Paeniglutamicibacter gangotriensis</i>      | WP_007273081 |
| 58 | 60712-61293 | → | 193 | thymidylate kinase                         | 193/193 (100%) | <i>Paeniglutamicibacter gangotriensis</i>      | WP_007273080 |
| 59 | 61405-62739 | → | 444 | DNA polymerase V subunit UmuC              | 401/436 (92%)  | <i>Paeniglutamicibacter gangotriensis</i>      | WP_007273048 |
| 60 | 63954-63601 | ← | 117 | hypothetical protein                       | -/-            | none                                           | -            |

**pA8H1**

*pA8H1\_p...*

|    |             |   |     |                                        |                |                                                |              |
|----|-------------|---|-----|----------------------------------------|----------------|------------------------------------------------|--------------|
| 1  | 78-728      | → | 216 | partitioning protein A                 | 177/214 (83%)  | <i>Arthrobacter sp. YC-RL1</i>                 | WP_047117786 |
| 2  | 725-961     | → | 78  | partitioning protein B                 | 57/78 (78%)    | <i>Arthrobacter sp. YC-RL1</i>                 | WP_047117785 |
| 3  | 1365-1799   | → | 144 | DNA polymerase V subunit UmuD          | 136/143 (95%)  | <i>Paeniglutamicibacter gangotriensis</i>      | WP_007273049 |
| 4  | 1954-3075   | → | 373 | tyrosine recombinase XerC              | 371/373 (99%)  | <i>Paeniglutamicibacter gangotriensis</i>      | WP_007273086 |
| 5  | 3072-3422   | → | 116 | transcriptional regulator, XRE family  | 116/116 (100%) | <i>Paeniglutamicibacter gangotriensis</i>      | WP_007273085 |
| 6  | 3412-5898   | → | 828 | site-specific recombinase XerD         | 827/828 (99%)  | <i>Paeniglutamicibacter gangotriensis Lz1y</i> | EMQ96799     |
| 7  | 6157-7079   | → | 340 | tellurium resistance protein TerC      | 340/340 (100%) | <i>Paeniglutamicibacter gangotriensis</i>      | WP_007273083 |
| 8  | 7176-8009   | → | 277 | cation-transporting ATPase             | 277/277 (100%) | <i>Paeniglutamicibacter gangotriensis</i>      | WP_007273082 |
| 9  | 8206-8511   | → | 101 | putative termination factor Rho        | 101/101 (100%) | <i>Paeniglutamicibacter gangotriensis</i>      | WP_007273081 |
| 10 | 8618-9199   | → | 193 | thymidylate kinase                     | 193/193 (100%) | <i>Paeniglutamicibacter gangotriensis</i>      | WP_007273080 |
| 11 | 9311-9577   | → | 88  | DNA polymerase V subunit UmuC, partial | 81/88 (92%)    | <i>Paeniglutamicibacter gangotriensis Lz1y</i> | EMQ96794     |
| 12 | 9690-10781  | → | 363 | laminarinase                           | 363/363 (100%) | <i>Paeniglutamicibacter gangotriensis</i>      | WP_007273079 |
| 13 | 11340-11047 | ← | 97  | hypothetical protein                   | 84/97 (87%)    | <i>Paeniglutamicibacter gangotriensis</i>      | WP_007273077 |
| 14 | 11768-11923 | → | 51  | hypothetical protein                   | 50/51 (98%)    | <i>Paeniglutamicibacter gangotriensis Lz1y</i> | EMQ96791     |
| 15 | 13183-11993 | ← | 396 | filamentation protein                  | 396/396 (100%) | <i>Paeniglutamicibacter gangotriensis</i>      | WP_007273075 |
| 16 | 13722-14744 | → | 340 | tellurium resistance protein TerC      | 340/340 (100%) | <i>Paeniglutamicibacter gangotriensis</i>      | WP_007273074 |
| 17 | 14886-15461 | → | 191 | hypothetical protein                   | 191/191 (100%) | <i>Paeniglutamicibacter gangotriensis</i>      | WP_007273072 |

|    |             |   |     |                                        |                |                                                |              |
|----|-------------|---|-----|----------------------------------------|----------------|------------------------------------------------|--------------|
| 18 | 16738-15548 | ← | 396 | hypothetical protein                   | 167/393 (42%)  | <i>Microbacterium ginsengisoli</i>             | WP_045248425 |
| 19 | 17087-16740 | ← | 115 | transcriptional regulator, XRE family  | 87/117 (74%)   | <i>Pseudonocardia autotrophica</i>             | OSY36007     |
| 20 | 18211-17084 | ← | 375 | tyrosine recombinase XerC              | 262/360 (73%)  | <i>Microbacterium ginsengisoli</i>             | KJL35305     |
| 21 | 18429-19442 | → | 337 | DNA polymerase V subunit UmuC          | 316/337 (94%)  | <i>Arthrobacter sp. UCD-GKA</i>                | WP_071216190 |
| 22 | 20561-19515 | ← | 348 | hypothetical protein                   | 191/328 (58%)  | <i>Glutamicibacter halophytocola</i>           | WP_060700398 |
| 23 | 21731-22711 | → | 326 | hypothetical protein                   | 234/319 (73%)  | <i>Arthrobacter sp. YC_RL1</i>                 | WP_052772146 |
| 24 | 23294-24283 | → | 329 | hypothetical protein                   | 207/329 (63%)  | <i>Paeniglutamicibacter antarcticus</i>        | WP_084382566 |
| 25 | 24365-24781 | → | 138 | hypothetical protein                   | 103/133 (77%)  | <i>Paeniglutamicibacter antarcticus</i>        | WP_068738522 |
| 26 | 24794-25198 | → | 134 | hypothetical protein                   | 113/134 (84%)  | <i>Paeniglutamicibacter antarcticus</i>        | WP_068738520 |
| 27 | 25201-25497 | → | 98  | hypothetical protein                   | 52/100 (52%)   | <i>Paeniglutamicibacter antarcticus</i>        | WP_068738518 |
| 28 | 26211-28061 | → | 616 | type I RM protein subunit M            | 361/630 (57%)  | <i>Paenibacillus sabiniae</i>                  | WP_025334610 |
| 29 | 28064-28567 | → | 167 | type I RM protein subunit S, truncated | 83/158 (53%)   | <i>Mycobacterium abscessus</i>                 | WP_079609079 |
| 30 | 28465-29034 | → | 189 | type I RM protein subunit S, truncated | 92/180 (51%)   | <i>Actinobacteria</i>                          | WP_051132165 |
| 31 | 30027-29314 | ← | 237 | hypothetical protein                   | 148/232 (64%)  | <i>Kocuria sp. SM24M-10</i>                    | WP_047803197 |
| 32 | 30429-30031 | ← | 132 | hypothetical protein                   | 85/115 (74%)   | <i>Kocuria sp. SM24M-10</i>                    | KLU08433     |
| 33 | 32295-30772 | ← | 507 | sulfate permease                       | 479/507 (94%)  | <i>Arthrobacter sp. UCD-GKA</i>                | WP_071214384 |
| 34 | 32482-32874 | → | 130 | transcriptional regulator, MerR family | 112/129 (87%)  | <i>Paeniglutamicibacter gangotriensis</i>      | WP_007272368 |
| 35 | 33583-33326 | ← | 85  | transcriptional regulator, CsoR family | 85/85 (100%)   | <i>Arthrobacter</i>                            | WP_022876876 |
| 36 | 33750-33926 | → | 58  | hypothetical protein                   | 52/58 (90%)    | <i>Arthrobacter sp. 7749</i>                   | ASN39331     |
| 37 | 34101-35498 | → | 465 | persulfide dioxygenase                 | 465/465 (100%) | <i>Arthrobacter</i>                            | WP_022876878 |
| 38 | 35613-36197 | → | 194 | sulfurtransferase                      | 193/194 (99%)  | <i>Arthrobacter</i>                            | WP_022876879 |
| 39 | 36318-36614 | → | 98  | sulfurtransferase                      | 98/98 (100%)   | <i>Arthrobacter sp. YC_RL1</i>                 | WP_047117791 |
| 40 | 36680-37576 | → | 298 | sulfite exporter TauE/SafE family      | 291/298 (98%)  | <i>Arthrobacter sp. PAO19</i>                  | WP_022876881 |
| 41 | 37631-38959 | → | 442 | MFS transporter                        | 440/442 (99%)  | <i>Arthrobacter sp. YC_RL1</i>                 | WP_047117789 |
| 42 | 39048-39467 | → | 139 | ABC transporter                        | 139/139 (100%) | <i>Arthrobacter</i>                            | WP_022876883 |
| 43 | 39845-40456 | → | 203 | resolvase                              | 202/203 (99%)  | <i>Paeniglutamicibacter gangotriensis LzIy</i> | EMQ96627     |
| 44 | 40687-41415 | → | 242 | hypothetical protein                   | 113/240 (47%)  | <i>Tersicoccus sp. Bi-70</i>                   | WP_076695439 |
| 45 | 41493-41723 | → | 76  | hypothetical protein                   | 41/71 (58%)    | <i>Arthrobacter sp. YC_RL1</i>                 | WP_082123748 |
| 46 | 41876-43279 | → | 467 | hypothetical protein                   | 209/439 (48%)  | <i>Arthrobacter sp. YC_RL1</i>                 | WP_047117787 |

**pA40H1**

| <i>pA40H1_p...</i> |           |   |     |                                             |               |                                                |              |
|--------------------|-----------|---|-----|---------------------------------------------|---------------|------------------------------------------------|--------------|
| 01                 | 90-860    | → | 256 | partitioning protein ParA                   | 180/256 (70%) | <i>Paeniglutamicibacter antarcticus</i>        | WP_068738528 |
| 02                 | 857-1138  | → | 93  | partitioning protein ParB                   | 32/96 (33%)   | <i>Microbacterium sp. CHI2i</i>                | WP_036282148 |
| 03                 | 1534-1181 | ← | 117 | truncated transposase                       | 33/43 (77%)   | <i>Paeniglutamicibacter gangotriensis LzIy</i> | EMQ96780     |
| 04                 | 2414-1875 | ← | 179 | DNA invertase/recombinase                   | 168/179 (94%) | <i>Arthrobacter alpinus</i>                    | WP_074713669 |
| 05                 | 2841-2431 | ← | 136 | hypothetical protein, truncated transposase | 64/98 (65%)   | <i>Arthrobacter alpinus</i>                    | WP_062008744 |
| 06                 | 2925-3134 | → | 69  | DNA polymerase V subunit UmuC, partial      | 56/63 (89%)   | <i>Paeniglutamicibacter gangotriensis</i>      | WP_007273048 |
| 07                 | 3446-3252 | ← | 64  | transcriptional regulator, XRE-family       | 54/63 (86%)   | <i>Arthrobacter sp. Edens01</i>                | WP_055240980 |

|    |             |   |      |                                                                  |                 |                                           |              |
|----|-------------|---|------|------------------------------------------------------------------|-----------------|-------------------------------------------|--------------|
| 08 | 3910-3446   | ← | 154  | hypothetical protein                                             | 84/150 (56%)    | <i>Arthrobacter koreensis</i>             | WP_091604535 |
| 09 | 4193-4777   | → | 194  | resolvase, DNA invertase                                         | 194/194 (100%)  | <i>Arthrobacter sp. TB 23</i>             | WP_019481146 |
| 10 | 5029-6003   | → | 324  | hypothetical protein                                             | 207/322 (64%)   | <i>Arthrobacter sp. J3.40</i>             | WP_015061943 |
| 11 | 6903-6247   | ← | 218  | hypothetical protein                                             | -/-             | none                                      | -            |
| 12 | 7660-8274   | → | 204  | hypothetical protein                                             | 169/198 (85%)   | <i>Paeniglutamicibacter gangotriensis</i> | WP_007273036 |
| 13 | 8581-10098  | → | 505  | type I restriction-modification system, subunit M, SAM-dependent | 409/505 (81%)   | <i>Arthrobacter crystallopoietes</i>      | WP_005266257 |
| 14 | 10292-11305 | → | 337  | type I restriction-modification system, subunit S                | 187/408 (46%)   | <i>Arthrobacter crystallopoietes</i>      | WP_081608413 |
| 15 | 11306-11785 | → | 159  | addiction module toxin                                           | 76/154 (49%)    | <i>Rhodococcus pyridinivorans</i>         | WP_064060139 |
| 16 | 11875-12216 | → | 113  | addiction module antitoxin                                       | 73/113 (65%)    | <i>Arthrobacter sp. WI</i>                | WP_052253545 |
| 17 | 12330-15359 | → | 1009 | type I restriction endonuclease subunit R                        | 747/1012 (74%)  | <i>Arthrobacter crystallopoietes</i>      | WP_005269194 |
| 18 | 18864-15407 | ← | 1152 | HNH endonuclease                                                 | 720/1141 (63%)  | <i>Leucobacter sp. UCD-THU</i>            | WP_031289558 |
| 19 | 19136-19309 | → | 57   | invertase, partial                                               | 32/40 (80%)     | <i>Paeniglutamicibacter gangotriensis</i> | WP_007272296 |
| 20 | 20058-19375 | ← | 227  | hypothetical protein                                             | 133/221 (60%)   | <i>Mycobacterium sinense</i>              | WP_064922354 |
| 21 | 21403-20252 | ← | 383  | Zn-dependent peptidase ImmA, M78 family                          | 213/381 (56%)   | <i>Paenarthrobacter nicotinovorans</i>    | GAT87930     |
| 22 | 22046-21396 | ← | 216  | hypothetical protein                                             | 113/217 (52%)   | <i>Paenarthrobacter nicotinovorans</i>    | WP_064722765 |
| 23 | 23604-22498 | ← | 368  | hypothetical protein                                             | 180/373 (48%)   | <i>Micromonospora narathiwatensis</i>     | WP_091191950 |
| 24 | 24322-23750 | ← | 190  | DNA resolvase                                                    | 184/190 (97%)   | <i>Arthrobacter sp. UCD-GKA</i>           | WP_071216176 |
| 25 | 25223-24921 | ← | 100  | hypothetical protein                                             | 57/99 (58%)     | <i>Paeniglutamicibacter antarcticus</i>   | WP_068738518 |
| 26 | 25917-25585 | ← | 110  | hypothetical protein                                             | 59/110 (54%)    | <i>Arthrobacter sp. B6</i>                | WP_066286544 |
| 27 | 27503-26505 | ← | 332  | pepsidase                                                        | 190/298 (64%)   | <i>Arthrobacter sp. UCD-GKA</i>           | WP_071216184 |
| 28 | 28161-27619 | ← | 180  | hypothetical protein                                             | 88/180 (49%)    | <i>Arthrobacter sp. ok362</i>             | WP_091561456 |
| 29 | 30386-28806 | ← | 526  | signal transduction histidine kinase                             | 406/525 (77%)   | <i>Arthrobacter sp. UCD-GKA</i>           | WP_071216182 |
| 30 | 31237-30386 | ← | 283  | alpha/beta hydrolase                                             | 229/283 (81%)   | <i>Arthrobacter sp. UCD-GKA</i>           | WP_071216183 |
| 31 | 31536-31790 | → | 84   | hypothetical protein                                             | 44/80 (55%)     | <i>Arthrobacter sp. ZXY-2</i>             | WP_071416815 |
| 32 | 33179-32472 | ← | 235  | hypothetical protein                                             | 194/235 (83%)   | <i>Paeniglutamicibacter antarcticus</i>   | WP_068731980 |
| 33 | 34106-34816 | → | 236  | resolvase/DNA invertase                                          | 157/207 (76%)   | <i>Arthrobacter sp. H5</i>                | WP_081746535 |
| 34 | 34767-40304 | → | 1845 | adenine-specific DNA methylase, N12 class, helicase              | 1256/1847 (68%) | <i>Arthrobacter luteolus</i>              | WP_083521870 |
| 35 | 40810-40526 | ← | 94   | hypothetical protein                                             | 55/89 (62%)     | <i>Arthrobacter crystallopoietes</i>      | WP_005272797 |
| 36 | 41003-41398 | → | 131  | mobilization protein C                                           | 86/128 (67%)    | <i>Glutamicibacter arilaitensis Re117</i> | CBT74902     |
| 37 | 41395-43056 | → | 553  | relaxase                                                         | 459/554 (83%)   | <i>Paeniglutamicibacter antarcticus</i>   | WP_068731965 |
| 38 | 43101-44555 | → | 484  | hypothetical protein                                             | 316/396 (80%)   | <i>Paeniglutamicibacter antarcticus</i>   | WP_068731963 |
| 39 | 44669-46462 | → | 601  | hypothetical protein                                             | 344/596 (58%)   | <i>Nocardioides sp. Iso805N</i>           | WP_081615574 |
| 40 | 46945-46532 | ← | 137  | hypothetical protein                                             | 90/115 (78%)    | <i>Paeniglutamicibacter antarcticus</i>   | WP_084382367 |
| 41 | 49001-47202 | ← | 599  | conjugal transfer protein TraG                                   | 556/599 (93%)   | <i>Paeniglutamicibacter antarcticus</i>   | WP_068735628 |
| 42 | 50528-49002 | ← | 502  | ATP-binding protein                                              | 483/496 (97%)   | <i>Paeniglutamicibacter antarcticus</i>   | WP_068735626 |
| 43 | 52036-50528 | ← | 502  | hypothetical protein                                             | 488/502 (97%)   | <i>Paeniglutamicibacter antarcticus</i>   | WP_068735625 |

|    |             |   |     |                                                    |                |                                         |              |
|----|-------------|---|-----|----------------------------------------------------|----------------|-----------------------------------------|--------------|
| 44 | 53466-52033 | ← | 477 | hypothetical protein                               | 151/256 (59%)  | <i>Arthrobacter sp. J3.40</i>           | WP_015061895 |
| 45 | 54185-53463 | ← | 240 | hypothetical protein                               | 147/166 (89%)  | <i>Paeniglutamicibacter antarcticus</i> | WP_068735621 |
| 46 | 54489-54205 | ← | 94  | hypothetical protein                               | 91/94 (97%)    | <i>Paeniglutamicibacter antarcticus</i> | WP_068735618 |
| 47 | 55076-54486 | ← | 196 | hypothetical protein                               | 148/195 (76%)  | <i>Paeniglutamicibacter antarcticus</i> | WP_068735616 |
| 48 | 56521-55094 | ← | 475 | partitioning protein A                             | 406/482 (84%)  | <i>Paeniglutamicibacter antarcticus</i> | WP_068735614 |
| 49 | 57030-56554 | ← | 158 | hypothetical protein                               | 126/158 (80%)  | <i>Paeniglutamicibacter antarcticus</i> | WP_068735612 |
| 50 | 58187-57075 | ← | 370 | peptidase, M23 family                              | 315/350 (90%)  | <i>Paeniglutamicibacter antarcticus</i> | WP_068735610 |
| 51 | 58343-58654 | → | 103 | DNA-binding protein                                | 73/78 (94%)    | <i>Paeniglutamicibacter antarcticus</i> | WP_068735608 |
| 52 | 59267-58674 | ← | 197 | transposase, Tn3 family                            | 205/207 (99%)  | <i>Glutamicibacter sp. 0426</i>         | WP_073708019 |
| 53 | 61641-59272 | ← | 789 | transposase, Tn3 family                            | 772/781 (99%)  | <i>Glutamicibacter sp. 0426</i>         | WP_073708019 |
| 54 | 62292-61720 | ← | 190 | resolvase                                          | 189/190 (99%)  | <i>Glutamicibacter sp. BW80</i>         | WP_096287908 |
| 55 | 62613-62819 | → | 68  | copper chaperone, CopZ                             | 68/68 (100%)   | <i>Micrococcaceae</i>                   | WP_047117896 |
| 56 | 62816-63751 | → | 311 | heavy metal-binding protein                        | 311/311 (100%) | <i>Micrococcaceae</i>                   | WP_047117895 |
| 57 | 63800-66067 | → | 755 | copper-translocating P-type ATPase, CopA           | 730/755 (97%)  | <i>Glutamicibacter sp. 0426</i>         | WP_073708020 |
| 58 | 66304-66191 | ← | 37  | hypothetical protein                               | 36/37 (97%)    | <i>Acinetobacter gyllenbergii</i>       | EPH35188     |
| 59 | 66593-66279 | ← | 104 | transcriptional regulator, ArsR family             | 104/104 (100%) | <i>Proteobacteria</i>                   | WP_000349485 |
| 60 | 66705-67739 | → | 344 | permease                                           | 343/344 (99%)  | <i>Proteobacteria</i>                   | WP_000098298 |
| 61 | 67752-69029 | → | 425 | transposase, ISL3 family                           | 425/425 (100%) | <i>Proteobacteria</i>                   | WP_000610830 |
| 62 | 69112-69381 | → | 89  | hypothetical protein                               | 83/89 (93%)    | <i>Micrococcaceae</i>                   | WP_047117893 |
| 63 | 69667-69996 | → | 109 | transcriptional regulator, CopY family             | 109/109 (100%) | <i>Micrococcaceae</i>                   | WP_047117892 |
| 64 | 70303-70936 | → | 211 | hypothetical protein                               | 211/211 (100%) | <i>Micrococcaceae</i>                   | WP_047117907 |
| 65 | 71204-71785 | → | 193 | alkylhydroperoxidase                               | 192/193 (99%)  | <i>Arthrobacter sp. YC-RL1</i>          | KLI90490     |
| 66 | 71865-73298 | → | 477 | MFS transporter, H <sup>+</sup> antiporter protein | 474/477 (99%)  | <i>Micrococcaceae</i>                   | WP_047117890 |
| 67 | 73814-74380 | → | 188 | hypothetical protein                               | 146/184 (79%)  | <i>Paeniglutamicibacter antarcticus</i> | WP_068735606 |
| 68 | 75081-74353 | ← | 242 | hypothetical protein                               | 192/242 (79%)  | <i>Paeniglutamicibacter antarcticus</i> | WP_068735604 |
| 69 | 75773-75081 | ← | 230 | hypothetical protein                               | 199/230 (87%)  | <i>Paeniglutamicibacter antarcticus</i> | WP_068735602 |
| 70 | 76046-76273 | → | 75  | hypothetical protein                               | 45/75 (60%)    | <i>Arthrobacter sp. SRS-W-1-2016</i>    | WP_078106431 |
| 71 | 76563-78287 | → | 574 | transcriptional regulator, MarR family             | 413/576 (72%)  | <i>Paeniglutamicibacter antarcticus</i> | WP_068735600 |

**pA40H2**

pA40H2\_p...

|    |           |   |     |                                       |                |                                                |              |
|----|-----------|---|-----|---------------------------------------|----------------|------------------------------------------------|--------------|
| 01 | 241-1038  | → | 265 | partitioning protein ParA             | 191/265 (72%)  | <i>Kocuria marina</i>                          | KHE74185     |
| 02 | 1035-1397 | → | 120 | hypothetical protein                  | 76/120 (63%)   | <i>Kocuria marina</i>                          | WP_035964271 |
| 03 | 1790-2224 | → | 144 | DNA polymerase V subunit UmuD         | 133/143 (93%)  | <i>Paeniglutamicibacter gangotriensis</i>      | WP_007273049 |
| 04 | 2379-3500 | → | 373 | tyrosine recombinase XerD             | 372/373 (99%)  | <i>Paeniglutamicibacter gangotriensis</i>      | WP_007273086 |
| 05 | 3497-3847 | → | 116 | transcriptional regulator, XRE family | 116/116 (100%) | <i>Paeniglutamicibacter gangotriensis</i>      | WP_007273085 |
| 06 | 3837-6323 | → | 828 | Site-specific recombinase XerC        | 826/828 (99%)  | <i>Paeniglutamicibacter gangotriensis Lz1y</i> | EMQ96799     |
| 07 | 6582-7604 | → | 340 | tellurium resistance protein TerC     | 340/340 (100%) | <i>Paeniglutamicibacter gangotriensis</i>      | WP_007273083 |
| 08 | 7601-8434 | → | 277 | cation-transporting ATPase            | 277/277 (100%) | <i>Paeniglutamicibacter gangotriensis</i>      | WP_007273082 |

|    |             |   |      |                                                         |                |                                                |              |
|----|-------------|---|------|---------------------------------------------------------|----------------|------------------------------------------------|--------------|
| 09 | 8631-8936   | → | 101  | transcription termination factor Rho                    | 101/101 (100%) | <i>Paeniglutamicibacter gangotriensis</i>      | WP_007273081 |
| 10 | 9043-9624   | → | 193  | thymidylate kinase                                      | 193/193 (100%) | <i>Paeniglutamicibacter gangotriensis</i>      | WP_007273080 |
| 11 | 9736-11070  | → | 444  | DNA polymerase V subunit UmuC                           | 400/432 (93%)  | <i>Paeniglutamicibacter gangotriensis</i>      | WP_007273048 |
| 12 | 11539-11715 | → | 58   | hypothetical protein                                    | 41/58 (71%)    | <i>Arthrobacter sp. YC-RL1</i>                 | WP_047117640 |
| 13 | 11750-12730 | → | 326  | hypothetical protein                                    | 230/319 (72%)  | <i>Arthrobacter sp. YC-RL1</i>                 | WP_052772146 |
| 14 | 14888-15877 | → | 105  | hypothetical protein                                    | 27/86 (31%)    | <i>Arthrobacter nitrophenolicus</i>            | WP_009359328 |
| 15 | 15971-16375 | → | ?    | hypothetical protein                                    | 230/361 (64%)  | <i>Paeniglutamicibacter antarcticus</i>        | WP_084382566 |
| 16 | 15959-16375 | → | 138  | hypothetical protein                                    | 98/123 (80%)   | <i>Paeniglutamicibacter antarcticus</i>        | WP_068738522 |
| 17 | 16388-16792 | → | 134  | hypothetical protein                                    | 116/133 (87%)  | <i>Paeniglutamicibacter antarcticus</i>        | WP_068738520 |
| 18 | 16795-17091 | → | 98   | hypothetical protein                                    | 53/100 (53%)   | <i>Paeniglutamicibacter antarcticus</i>        | WP_068738518 |
| 19 | 17095-17376 | ← | 93   | hypothetical protein                                    | 31/76 (41%)    | <i>Sinomonas mesophila</i>                     | WP_077490866 |
| 20 | 17755-18009 | → | 84   | NrdH-redoxin                                            | 69/84 (82%)    | <i>Paeniglutamicibacter antarcticus</i>        | WP_068738516 |
| 21 | 18006-18206 | → | 66   | hypothetical protein                                    | 45/52 (87%)    | <i>Paeniglutamicibacter antarcticus</i>        | WP_068738514 |
| 22 | 18203-18637 | → | 144  | hypothetical protein                                    | 32/90 (36%)    | <i>Photobacterium piscicola</i>                | WP_080157527 |
| 23 | 18838-19242 | → | 134  | hypothetical protein                                    | 82/132 (62%)   | <i>Glutamicibacter sp. BW77</i>                | WP_096254231 |
| 24 | 22664-19320 | ← | 1114 | DNA methyltransferase                                   | 628/937 (67%)  | <i>Arthrobacter sp. RIT-PI-e</i>               | WP_082177329 |
| 25 | 24182-22719 | ← | 487  | hypothetical protein                                    | 427/487 (88%)  | <i>Arthrobacter sp. 49Tsu3.1M3</i>             | SKB43645     |
| 26 | 24784-24179 | ← | 201  | hypothetical protein                                    | 179/201 (89%)  | <i>Arthrobacter sp. 49Tsu3.1M3</i>             | SKB43651     |
| 27 | 26832-25309 | ← | 507  | SulP family inorganic anion transporter                 | 480/507 (95%)  | <i>Arthrobacter sp. UCD-GKA</i>                | WP_071214384 |
| 28 | 27019-27411 | → | 130  | transcriptional regulator, MerR family                  | 112/129 (87%)  | <i>Paeniglutamicibacter gangotriensis</i>      | WP_007272368 |
| 29 | 28111-27854 | ← | 85   | transcriptional regulator, CsoR family                  | 85/85 (100%)   | <i>Micrococcaceae</i>                          | WP_022876876 |
| 30 | 28278-28454 | → | 58   | hypothetical protein                                    | 53/58 (91%)    | <i>Arthrobacter sp. 7749</i>                   | ASN39331     |
| 31 | 28629-30026 | → | 465  | persulfide dioxygenase A                                | 459/465 (99%)  | <i>Arthrobacter</i>                            | WP_022876878 |
| 32 | 30114-30725 | → | 203  | rhodanese-related sulfurtransferase                     | 190/203 (94%)  | <i>Glutamicibacter sp. BW80</i>                | WP_096287256 |
| 33 | 30816-31112 | → | 98   | rhodanese-related sulfurtransferase                     | 98/98 (100%)   | <i>Arthrobacter sp. UCD-GKA</i>                | WP_071214388 |
| 34 | 31176-32072 | → | 298  | sulfite exporter TauE/SafE                              | 297/298 (99%)  | <i>Glutamicibacter sp. BW80</i>                | WP_096287260 |
| 35 | 32127-33455 | → | 442  | MFS transporter                                         | 435/442 (98%)  | <i>Paeniglutamicibacter gangotriensis</i>      | WP_007273058 |
| 36 | 33542-33961 | → | 139  | hypothetical protein                                    | 138/139 (99%)  | <i>Paeniglutamicibacter gangotriensis</i>      | WP_007273057 |
| 37 | 34380-34030 | ← | 116  | intracellular sulfur oxidation protein                  | 116/116 (100%) | <i>Paeniglutamicibacter gangotriensis</i>      | WP_007273056 |
| 38 | 35285-34377 | ← | 302  | cytochrome C biogenesis protein CcdA                    | 301/302 (99%)  | <i>Paeniglutamicibacter gangotriensis</i>      | WP_007273055 |
| 39 | 36088-35285 | ← | 267  | thiol-disulfide oxidoreductase                          | 266/267 (99%)  | <i>Paeniglutamicibacter gangotriensis</i>      | WP_007273054 |
| 40 | 36223-36774 | → | 183  | cytochrome c-type biogenesis protein CcdA (DsbD analog) | 183/183 (100%) | <i>Paeniglutamicibacter gangotriensis</i>      | WP_007273053 |
| 41 | 36771-37169 | → | 132  | transcriptional regulator                               | 131/132 (99%)  | <i>Paeniglutamicibacter gangotriensis</i>      | WP_007273052 |
| 42 | 37518-38129 | → | 203  | resolvase                                               | 202/203 (99%)  | <i>Paeniglutamicibacter gangotriensis Lz1y</i> | EMQ96627     |
| 43 | 39342-38410 | ← | 310  | hypothetical protein                                    | 102/293 (35%)  | <i>Brevibacterium linens</i>                   | WP_096160932 |
| 44 | 39687-41099 | → | 470  | hypothetical protein                                    | 193/456 (42%)  | <i>Leifsonia aquatica</i>                      | WP_025155972 |
| 45 | 41683-42285 | → | 200  | hypothetical protein                                    | 178/202 (88%)  | <i>Paeniglutamicibacter gangotriensis</i>      | WP_007273036 |
| 46 | 43931-43092 | ← | 279  | endonuclease                                            | 239/278 (86%)  | <i>Arthrobacter sp. AK-YN10</i>                | ERI35594     |

|    |             |   |      |                                                                                     |                 |                                                |              |
|----|-------------|---|------|-------------------------------------------------------------------------------------|-----------------|------------------------------------------------|--------------|
| 47 | 45084-43921 | ← | 387  | DNA cytosine methyltransferase                                                      | 235/381 (62%)   | <i>Rhodococcus</i>                             | WP_094633520 |
| 48 | 45518-46129 | → | 203  | serine resolvase, DNA invertase                                                     | 112/201 (56%)   | <i>Arthrobacter</i> sp. P2b                    | WP_079599224 |
| 49 | 46822-46205 | ← | 205  | hypothetical protein                                                                | 45/197 (23%)    | <i>Cryobacterium luteum</i>                    | SEO03821     |
| 50 | 47232-46909 | ← | 107  | DNA-cytosine methyltransferase, partial abortive infection phage resistance protein | 38/69 (55%)     | <i>Rhodococcus</i> sp. AW25M09                 | CCQ14341     |
| 51 | 49276-47501 | ← | 591  | AbiU                                                                                | 269/568 (47%)   | <i>Streptomyces achromogenes</i>               | WP_078844454 |
| 52 | 49665-50078 | → | 137  | hypothetical protein                                                                | 57/145 (39%)    | <i>Leucobacter komagatae</i>                   | WP_042543649 |
| 53 | 50159-50515 | → | 118  | hypothetical protein                                                                | 66/106 (62%)    | <i>Nesterenkonia massiliensis</i>              | WP_044495328 |
| 54 | 50809-52026 | → | 405  | hypothetical protein                                                                | 125/409 (31%)   | <i>Paenarthrobacter nicotinovorans</i>         | WP_064721708 |
| 55 | 52635-52027 | ← | 202  | DNA resolvase                                                                       | 182/190 (96%)   | <i>Arthrobacter</i> sp. UCD-GKA                | WP_071215874 |
| 56 | 53001-53624 | → | 207  | hypothetical protein                                                                | -/-             | none                                           | -            |
| 57 | 53617-54354 | → | 245  | hypothetical protein                                                                | -/-             | none                                           | -            |
| 58 | 54609-55304 | → | 231  | hypothetical protein                                                                | 152/231 (66%)   | <i>Paeniglutamicibacter gangotriensis</i>      | WP_007273096 |
| 59 | 55600-56310 | → | 236  | DNA resolvase/invertase                                                             | 146/193 (76%)   | <i>Arthrobacter</i> sp. H5                     | WP_081746535 |
| 60 | 56261-61795 | → | 1844 | adenine-specific DNA methylase, N12 class                                           | 1246/1832 (68%) | <i>Arthrobacter luteolus</i>                   | WP_083521870 |
| 61 | 62321-62037 | ← | 94   | hypothetical protein                                                                | 59/90 (66%)     | <i>Arthrobacter</i> sp. EPSL27                 | WP_066435256 |
| 62 | 62515-62907 | → | 130  | mobilization protein MobC                                                           | 77/126 (61%)    | <i>Arthrobacter crystallopoietes</i>           | SDR29386     |
| 63 | 62904-64577 | → | 557  | relaxase                                                                            | 410/558 (73%)   | <i>Paeniglutamicibacter gangotriensis</i>      | WP_068731965 |
| 64 | 64622-65824 | → | 400  | hypothetical protein                                                                | 326/400 (82%)   | <i>Paeniglutamicibacter gangotriensis</i>      | WP_068731963 |
| 65 | 66239-66730 | → | 163  | hypothetical protein                                                                | 58/140 (41%)    | <i>Microbacterium chocolatum</i>               | WP_053549043 |
| 66 | 67949-67518 | ← | 143  | hypothetical protein                                                                | 81/115 (70%)    | <i>Paeniglutamicibacter gangotriensis</i>      | WP_084382367 |
| 67 | 69972-68173 | ← | 599  | conjugal transfer protein TraG                                                      | 574/599 (96%)   | <i>Paeniglutamicibacter antarcticus</i>        | WP_068735628 |
| 68 | 71451-69973 | ← | 492  | ATP/GTP-binding conjugal protein                                                    | 478/497 (96%)   | <i>Paeniglutamicibacter antarcticus</i>        | WP_068735626 |
| 69 | 72956-71448 | ← | 502  | hypothetical membrane protein                                                       | 489/502 (99%)   | <i>Paeniglutamicibacter antarcticus</i>        | WP_068735625 |
| 70 | 74548-72953 | ← | 531  | hypothetical protein                                                                | 247/264 (94%)   | <i>Paeniglutamicibacter antarcticus</i>        | WP_068735622 |
| 71 | 75267-74545 | ← | 240  | hypothetical protein                                                                | 136/166 (82%)   | <i>Paeniglutamicibacter antarcticus</i>        | WP_068735621 |
| 72 | 75571-75287 | ← | 94   | hypothetical protein                                                                | 91/94 (97%)     | <i>Paeniglutamicibacter antarcticus</i>        | WP_068735618 |
| 73 | 76158-75568 | ← | 196  | hypothetical protein                                                                | 147/196 (75%)   | <i>Paeniglutamicibacter antarcticus</i>        | WP_068735616 |
| 74 | 77600-76176 | ← | 474  | partitioning protein ParA                                                           | 409/478 (86%)   | <i>Paeniglutamicibacter antarcticus</i>        | WP_068735614 |
| 75 | 78143-77631 | ← | 170  | hypothetical protein                                                                | 158/170 (93%)   | <i>Paeniglutamicibacter antarcticus</i>        | WP_068735612 |
| 76 | 79276-78140 | ← | 378  | peptidase M23                                                                       | 314/349 (90%)   | <i>Paeniglutamicibacter antarcticus</i>        | WP_068735610 |
| 77 | 79427-79699 | → | 90   | transcriptional regulator, ArsR family                                              | 56/90 (62%)     | <i>Arthrobacter castelli</i>                   | WP_035770425 |
| 78 | 79851-80582 | → | 243  | transcriptional regulator, XRE family                                               | 102/243 (42%)   | <i>Arthrobacter saudimassiliensis</i>          | CEA07078     |
| 79 | 80582-81310 | → | 242  | hypothetical protein                                                                | 116/242 (48%)   | <i>Tersicoccus</i> sp. Bi-70                   | WP_076695439 |
| 80 | 81384-81611 | → | 75   | hypothetical protein                                                                | 50/75 (67%)     | <i>Arthrobacter</i> sp. AK-YN10                | WP_043427946 |
| 81 | 81825-82862 | → | 345  | hypothetical protein                                                                | 182/345 (53%)   | <i>Arthrobacter</i> sp. TB 26                  | WP_024366458 |
| 82 | 82943-86035 | → | 1030 | Tn3 family transposase                                                              | 1029/1030 (99%) | <i>Paeniglutamicibacter gangotriensis</i>      | WP_007272224 |
| 83 | 86213-86356 | → | 47   | hypothetical protein, partial                                                       | 30/38 (79%)     | <i>Arthrobacter</i> sp. YC-RL1                 | KLI90155     |
| 84 | 86706-86440 | ← | 88   | hypothetical protein, cytochrome terminal                                           | 87/88 (99%)     | <i>Paeniglutamicibacter gangotriensis</i> Lz1y | EMQ97673     |



|    |             |   |     |                      |                |                                                |              |
|----|-------------|---|-----|----------------------|----------------|------------------------------------------------|--------------|
| 85 | 88051-86768 | ← | 427 | hypothetical protein | 427/427 (100%) | <i>Paeniglutamicibacter gangotriensis</i> Lz1y | EMQ97674     |
| 86 | 88793-88596 | ← | 65  | hypothetical protein | 65/65 (100%)   | <i>Paeniglutamicibacter gangotriensis</i>      | WP_083874168 |
| 87 | 89048-88914 | ← | 44  | hypothetical protein | 44/44 (100%)   | <i>Paeniglutamicibacter gangotriensis</i> Lz1y | EMQ97676     |
| 88 | 89316-89897 | → | 193 | serine resolvase     | 192/193 (99%)  | <i>Paeniglutamicibacter gangotriensis</i>      | WP_007272219 |
| 89 | 90247-90618 | → | 123 | hypothetical protein | 47/126 (37%)   | <i>Arthrobacter</i> sp. PAO19                  | WP_022875896 |

**pA58H1**

| <i>pA58H1_p...</i> |             |   |      |                                                     |                 |                                             |              |
|--------------------|-------------|---|------|-----------------------------------------------------|-----------------|---------------------------------------------|--------------|
| 01                 | 172-933     | → | 253  | partitioning protein ParA                           | 182/249 (73%)   | <i>Microbacterium esteraromaticum</i>       | SJN25287     |
| 02                 | 1011-1622   | → | 203  | hypothetical protein                                | 109/203 (54%)   | <i>Microbacterium</i> sp. H83               | WP_067117699 |
| 03                 | 1715-2011   | → | 98   | hypothetical protein                                | 42/86 (49%)     | <i>Arthrobacter</i> sp. 35W                 | WP_026554317 |
| 04                 | 2008-2319   | → | 103  | hypothetical protein                                | -/-             | none                                        | -            |
| 05                 | 2442-2669   | → | 75   | hypothetical protein                                | 51/72 (71%)     | <i>Arthrobacter</i> sp. YC-RL1              | WP_060617064 |
| 06                 | 3339-3539   | → | 66   | hypothetical protein                                | 44/64 (69%)     | <i>Arthrobacter</i> sp. YC-RL1              | WP_060617064 |
| 07                 | 4566-3622   | ← | 314  | type I restriction endonuclease subunit S           | 218/313 (70%)   | <i>Clavibacter michiganensis</i>            | WP_053774982 |
| 08                 | 6419-4563   | ← | 618  | type I restriction endonuclease subunit M           | 491/610 (80%)   | <i>Gordonia</i> sp. 852002-10350_SCH5691597 | WP_064861386 |
| 09                 | 6855-7532   | → | 225  | DNA invertase/resolvase                             | 164/207 (79%)   | <i>Arthrobacter</i> sp. H20                 | WP_081743482 |
| 10                 | 7598-8002   | → | 134  | hypothetical protein                                | 71/130 (55%)    | <i>Arthrobacter</i> sp. H5                  | WP_035775518 |
| 11                 | 8041-13062  | → | 1673 | Adenine-specific DNA methylase, N12 class, helicase | 1155/1661 (70%) | <i>Arthrobacter luteolus</i>                | WP_083521870 |
| 12                 | 14041-13766 | ← | 91   | hypothetical protein                                | 55/88 (63%)     | <i>Arthrobacter</i> sp. U41                 | WP_069953057 |
| 13                 | 14230-14628 | → | 132  | mobilization protein MobC                           | 88/103 (85%)    | <i>Paeniglutamicibacter antarcticus</i>     | WP_068731966 |
| 14                 | 14625-16289 | → | 554  | relaxase                                            | 448/554 (81%)   | <i>Paeniglutamicibacter antarcticus</i>     | WP_068731965 |
| 15                 | 16327-17526 | → | 399  | hypothetical protein                                | 290/400 (73%)   | <i>Paeniglutamicibacter antarcticus</i>     | WP_068731963 |
| 16                 | 18058-17603 | ← | 152  | hypothetical protein                                | 93/109 (85%)    | <i>Paeniglutamicibacter antarcticus</i>     | WP_084382367 |
| 17                 | 20102-18303 | ← | 599  | conjugal transfer protein                           | 566/599 (94%)   | <i>Paeniglutamicibacter antarcticus</i>     | WP_068735628 |
| 18                 | 21587-20103 | ← | 494  | ATP-binding protein                                 | 482/496 (97%)   | <i>Paeniglutamicibacter antarcticus</i>     | WP_068735626 |
| 19                 | 23122-21614 | ← | 502  | hypothetical protein                                | 489/502 (97%)   | <i>Paeniglutamicibacter antarcticus</i>     | WP_068735625 |
| 20                 | 24702-23119 | ← | 527  | hypothetical protein                                | 247/264 (94%)   | <i>Paeniglutamicibacter antarcticus</i>     | WP_068735622 |
| 21                 | 25415-24699 | ← | 238  | hypothetical protein                                | 138/167 (83%)   | <i>Paeniglutamicibacter antarcticus</i>     | WP_068735621 |
| 22                 | 25727-25443 | ← | 94   | hypothetical protein                                | 91/94 (97%)     | <i>Paeniglutamicibacter antarcticus</i>     | WP_068735618 |
| 23                 | 26314-25724 | ← | 196  | hypothetical protein                                | 145/195 (74%)   | <i>Paeniglutamicibacter antarcticus</i>     | WP_068735616 |
| 24                 | 27756-26332 | ← | 474  | partitioning protein ParA                           | 408/478 (85%)   | <i>Paeniglutamicibacter antarcticus</i>     | WP_068735614 |
| 25                 | 28299-27787 | ← | 170  | hypothetical protein                                | 158/170 (93%)   | <i>Paeniglutamicibacter antarcticus</i>     | WP_068735612 |
| 26                 | 29042-28296 | ← | 248  | peptidase M23                                       | 236/248 (95%)   | <i>Paeniglutamicibacter antarcticus</i>     | WP_068735610 |
| 27                 | 29611-29883 | → | 90   | transcriptional regulator, ArsR family              | 47/87 (54%)     | <i>Arthrobacter castelli</i>                | WP_035770425 |
| 28                 | 30047-30274 | → | 75   | hypothetical protein                                | 38/72 (53%)     | <i>Glutamicibacter</i> sp. BW77             | WP_096253929 |
| 29                 | 30424-31842 | → | 472  | hypothetical protein                                | 188/367 (51%)   | <i>Glutamicibacter</i> sp. BW77             | WP_096253930 |
| 30                 | 32235-32585 | → | 116  | hypothetical protein                                | 50/112 (45%)    | <i>Corynebacterium crudilactis</i>          | WP_066570273 |

31 33297-33641 → 114 hypothetical protein 65/114 (57%) *Microbacterium esteraromaticum* WP\_087130336

**pA58H2**

| <i>pA58H2_p...</i> |             |   |      |                                             |                |                                           |              |
|--------------------|-------------|---|------|---------------------------------------------|----------------|-------------------------------------------|--------------|
| 01                 | 276-1046    | → | 256  | partitioning protein ParA                   | 250/256 (98%)  | <i>Paeniglutamicibacter antarcticus</i>   | WP_068738528 |
| 02                 | 1043-1327   | → | 94   | partitioning protein ParB                   | 46/117 (39%)   | <i>Kocuria sp. UCD-OTCP</i>               | WP_017832696 |
| 03                 | 2218-1607   | ← | 203  | hypothetical protein                        | 184/203 (91%)  | <i>Arthrobacter sp. UCD-GKA</i>           | WP_071216150 |
| 04                 | 2465-2674   | → | 69   | hypothetical protein                        | 58/69 (84%)    | <i>Paeniglutamicibacter gangotriensis</i> | WP_007273045 |
| 05                 | 2840-3886   | → | 348  | hypothetical protein                        | 297/342 (87%)  | <i>Arthrobacter sp. ok909</i>             | WP_091256393 |
| 06                 | 7200-4195   | ← | 1001 | endonuclease of type III RM system          | 467/1002 (47%) | <i>Actinotignum timonense</i>             | WP_087070271 |
| 07                 | 8881-7205   | ← | 558  | DNA-methyltransferase, truncated            | 267/559 (48%)  | <i>Anaerococcus rubeinfantis</i>          | WP_058991267 |
| 08                 | 10417-8978  | ← | 479  | transposase of 481-family                   | 452/479 (94%)  | <i>Arthrobacter sp. UCD-GKA</i>           | WP_071216516 |
| 09                 | 10824-10468 | ← | 118  | DNA-methyltransferase, truncated            | 52/99 (53%)    | <i>Corynebacterium sp. L2-79-05</i>       | WP_011867707 |
| 10                 | 11646-11011 | ← | 211  | hypothetical protein                        | 136/210 (65%)  | <i>Glutamibacter sp. 0426</i>             | WP_073706563 |
| 11                 | 12266-11730 | ← | 178  | hypothetical protein                        | 91/167 (54%)   | <i>Sinomonas mesophila</i>                | WP_077490879 |
| 12                 | 12867-12553 | ← | 104  | transcriptional regulator, ArsR family      | 104/104 (100%) | <i>Proteobacteria</i>                     | WP_000349485 |
| 13                 | 13621-14013 | → | 130  | permease, partial                           | 129/130 (99%)  | <i>Oleibacter sp. HI0075</i>              | KZZ01663     |
| 14                 | 14026-15303 | → | 425  | transposase of ISL3-family                  | 425/425 (100%) | <i>Proteobacteria</i>                     | WP_000610830 |
| 15                 | 15954-15346 | ← | 202  | adenylate cyclase                           | 138/195 (71%)  | <i>Leifsonia sp. Leaf264</i>              | WP_055900772 |
| 16                 | 17137-16232 | ← | 301  | ATP-binding protein of transposon           | 232/301 (77%)  | <i>Arthrobacter castelli</i>              | WP_026820632 |
| 17                 | 18578-17124 | ← | 484  | transposase of Tn3-family                   | 370/484 (76%)  | <i>Brevibacterium</i>                     | WP_051505134 |
| 18                 | 19178-18585 | ← | 197  | recombinase of transposon                   | 185/195 (95%)  | <i>Arthrobacter sp. YC-RLI</i>            | WP_047118360 |
| 19                 | 19943-19545 | ← | 132  | transcriptional regulator, MecI family      | 132/132 (100%) | <i>Paeniglutamicibacter gangotriensis</i> | WP_007273052 |
| 20                 | 20491-19940 | ← | 183  | hypothetical protein                        | 180/183 (98%)  | <i>Paeniglutamicibacter gangotriensis</i> | WP_007273053 |
| 21                 | 20628-21452 | → | 274  | thiol-disulfide oxidoreductase              | 255/274 (93%)  | <i>Paeniglutamicibacter gangotriensis</i> | WP_007273054 |
| 22                 | 21452-22360 | → | 302  | cytochrome c biogenesis protein CcdA        | 301/302 (99%)  | <i>Paeniglutamicibacter gangotriensis</i> | WP_007273055 |
| 23                 | 22357-22707 | → | 116  | intracellular sulfur oxidation protein DsrE | 116/116 (100%) | <i>Paeniglutamicibacter gangotriensis</i> | WP_007273056 |
| 24                 | 23195-22776 | ← | 139  | hypothetical protein                        | 131/139 (94%)  | <i>Paeniglutamicibacter gangotriensis</i> | WP_007273057 |
| 25                 | 24610-23282 | ← | 442  | MFS transporter                             | 431/442 (98%)  | <i>Paeniglutamicibacter gangotriensis</i> | WP_007273058 |
| 26                 | 25561-24665 | ← | 298  | sulfite exporter TauE/SafE                  | 256/269 (95%)  | <i>Paeniglutamicibacter gangotriensis</i> | WP_007273059 |
| 27                 | 25921-25625 | ← | 98   | rhodanese-like domain-containing protein    | 98/98 (100%)   | <i>Arthrobacter sp. UCD-GKA</i>           | WP_071214388 |
| 28                 | 26596-26012 | ← | 194  | hypothetical protein                        | 190/194 (98%)  | <i>Arthrobacter sp. UCD-GKA</i>           | WP_071214387 |
| 29                 | 28108-26711 | ← | 465  | MBL fold metallo-hydrolase                  | 445/465 (96%)  | <i>Arthrobacter sp. YC-RLI</i>            | ALQ32526     |
| 30                 | 28459-28635 | → | 58   | hypothetical protein                        | 53/58 (91%)    | <i>Arthrobacter sp. 7749</i>              | ASN39331     |
| 31                 | 28626-28883 | → | 85   | transcriptional regulator, CsoR-family      | 85/85 (100%)   | <i>Arthrobacter sp. YC-RLI</i>            | ALQ32527     |
| 32                 | 29284-29850 | → | 188  | recombinase                                 | 177/186 (95%)  | <i>Arthrobacter sp. UCD-GKA</i>           | WP_071216167 |
| 33                 | 29847-30755 | → | 302  | hypothetical protein                        | 122/288 (42%)  | <i>Arthrobacter sp. ok909</i>             | SDP64712     |
| 34                 | 31173-32324 | → | 383  | hypothetical protein                        | 174/370 (47%)  | <i>Arthrobacter sp. N199823</i>           | WP_104111179 |
| 35                 | 32434-33945 | → | 503  | hypothetical protein                        | 219/515 (43%)  | <i>Arthrobacter sp. N199823</i>           | WP_104111179 |

|    |             |   |      |                                         |                 |                                           |              |
|----|-------------|---|------|-----------------------------------------|-----------------|-------------------------------------------|--------------|
| 36 | 34845-34057 | ← | 262  | hypothetical protein                    | 171/251 (68%)   | <i>Arthrobacter sp. 162MFSha1.1</i>       | WP_018771441 |
| 37 | 35766-35383 | ← | 127  | hypothetical protein                    | 54/97 (56%)     | <i>Arthrobacter sp. SRS-W-1-2016</i>      | WP_078105078 |
| 38 | 37636-35684 | ← | 650  | hypothetical protein                    | 353/629 (56%)   | <i>Arthrobacter sp. SRS-W-1-2016</i>      | WP_078105078 |
| 39 | 38039-37617 | ← | 140  | hypothetical protein                    | 62/110 (56%)    | <i>Arthrobacter sp. SRS-W-1-2016</i>      | WP_078105079 |
| 40 | 38239-38949 | → | 236  | recombinase                             | 156/210 (74%)   | <i>Arthrobacter sp. DWC3</i>              | WP_104051565 |
| 41 | 38982-39377 | → | 131  | hypothetical protein                    | 70/129 (54%)    | <i>Kocuria flava</i>                      | WP_101853274 |
| 42 | 39416-44437 | → | 1673 | helicase                                | 1187/1613 (74%) | <i>Arthrobacter subterraneus</i>          | SDI69836     |
| 43 | 44939-44658 | ← | 93   | hypothetical protein                    | 55/85 (65%)     | <i>Arthrobacter sp. AK-1</i>              | WP_012311548 |
| 44 | 45129-45527 | → | 132  | mobilization protein MobC               | 89/130 (68%)    | <i>Glutamicibacter arilaitensis Re117</i> | CBQ74062     |
| 45 | 45524-47188 | → | 554  | mobilization protein, relaxase          | 415/564 (74%)   | <i>Paeniglutamicibacter antarcticus</i>   | WP_068731965 |
| 46 | 47231-48424 | → | 397  | hypothetical protein                    | 285/397 (72%)   | <i>Paeniglutamicibacter antarcticus</i>   | WP_068731963 |
| 47 | 49028-48540 | ← | 162  | hypothetical protein                    | 82/159 (52%)    | <i>Arthrobacter sp. Soil762</i>           | WP_056345714 |
| 48 | 50194-49025 | ← | 389  | metallo-endopeptidase, ImmA/IrrE family | 192/390 (49%)   | <i>Geodermatophilus saharensis</i>        | WP_089404652 |
| 49 | 51034-50309 | ← | 241  | hypothetical protein                    | 78/114 (68%)    | <i>Paeniglutamicibacter antarcticus</i>   | WP_084382367 |
| 50 | 52850-51042 | ← | 602  | conjugal transfer protein               | 535/602 (89%)   | <i>Paeniglutamicibacter antarcticus</i>   | WP_068735628 |
| 51 | 54344-52851 | ← | 497  | ATP-binding protein                     | 486/497 (98%)   | <i>Paeniglutamicibacter antarcticus</i>   | WP_068735626 |
| 52 | 55867-54359 | ← | 502  | hypothetical protein                    | 490/502 (98%)   | <i>Paeniglutamicibacter antarcticus</i>   | WP_068735625 |
| 53 | 57432-55864 | ← | 522  | hypothetical protein                    | 260/264 (98%)   | <i>Paeniglutamicibacter antarcticus</i>   | WP_068735622 |
| 54 | 58151-57429 | ← | 240  | hypothetical protein                    | 162/166 (98%)   | <i>Paeniglutamicibacter antarcticus</i>   | WP_068735621 |
| 55 | 58453-58169 | ← | 94   | hypothetical protein                    | 89/94 (95%)     | <i>Paeniglutamicibacter antarcticus</i>   | WP_068735618 |
| 56 | 59040-58450 | ← | 196  | hypothetical protein                    | 143/196 (73%)   | <i>Paeniglutamicibacter antarcticus</i>   | WP_068735616 |
| 57 | 60467-59058 | ← | 469  | hypothetical protein                    | 393/472 (83%)   | <i>Paeniglutamicibacter antarcticus</i>   | WP_068735614 |
| 58 | 60997-60500 | ← | 165  | hypothetical protein                    | 132/170 (78%)   | <i>Paeniglutamicibacter antarcticus</i>   | WP_068735612 |
| 59 | 62133-60994 | ← | 379  | peptidase, M23-family                   | 349/379 (92%)   | <i>Paeniglutamicibacter antarcticus</i>   | WP_068735610 |
| 60 | 62286-62558 | → | 90   | transcriptional regulator, ArsR-family  | 56/90 (62%)     | <i>Arthrobacter castelli</i>              | WP_035770425 |
| 61 | 62711-63442 | → | 243  | hypothetical protein                    | 115/244 (47%)   | <i>Arthrobacter sp. B1805</i>             | WP_104119076 |
| 62 | 63442-64170 | → | 242  | hypothetical protein                    | 105/240 (44%)   | <i>Arthrobacter sp. B1805</i>             | WP_104119077 |
| 63 | 64243-64470 | → | 75   | hypothetical protein                    | 53/75 (71%)     | <i>Arthrobacter sp. SX1312</i>            | WP_104168933 |
| 64 | 64738-65721 | → | 327  | hypothetical protein                    | 181/327 (55%)   | <i>Arthrobacter sp. TB 26</i>             | WP_024366458 |
| 65 | 66119-66964 | → | 281  | DNA/RNA non-specific endonuclease       | 183/282 (65%)   | <i>Arthrobacter sp. MYb213</i>            | PRB66826     |
| 66 | 67353-67790 | → | 145  | hypothetical protein                    | 41/101 (41%)    | <i>Frankia sp. Cpl1-P</i>                 | KQM07901     |
| 67 | 67794-68192 | → | 132  | transposase of IS5-family               | 109/112 (97%)   | <i>Arthrobacter sp. UCD-GKA</i>           | WP_071216986 |
| 68 | 69947-68514 | ← | 477  | MFS transporter                         | 474/477 (99%)   | <i>Arthrobacter sp. YC-RL1</i>            | KLI90489     |
| 69 | 70608-70027 | ← | 193  | alkylhydroperoxidase                    | 192/193 (99%)   | <i>Arthrobacter sp. YC-RL1</i>            | KLI90490     |
| 70 | 71509-70661 | ← | 282  | hypothetical protein                    | 282/282 (100%)  | <i>Arthrobacter sp. YC-RL1</i>            | KLI90501     |
| 71 | 72145-71816 | ← | 109  | transcriptional regulator, CopY family  | 109/109 (100%)  | <i>Arthrobacter sp. YC-RL1</i>            | KLI90491     |
| 72 | 72700-72431 | ← | 89   | hypothetical protein                    | 83/89 (93%)     | <i>Arthrobacter sp. YC-RL1</i>            | KLI90492     |
| 73 | 73130-72753 | ← | 125  | Cu(2+)-exporting ATPase, partial        | 119/125 (95%)   | <i>Arthrobacter sp. YC-RL1</i>            | WP_047117894 |

## pA58H3

## pA58H3\_p...

|    |             |   |     |                                                                             |               |                                           |              |
|----|-------------|---|-----|-----------------------------------------------------------------------------|---------------|-------------------------------------------|--------------|
| 01 | 248-1045    | → | 265 | partitioning protein ParA                                                   | 192/265 (72%) | <i>Kocuria marina</i>                     | KHE74185     |
| 02 | 1042-1404   | → | 120 | hypothetical protein                                                        | 76/120 (63%)  | <i>Kocuria marina</i>                     | WP_035964271 |
| 03 | 2016-2447   | → | 143 | DNA polymerase V subunit UmuD                                               | 131/141 (93%) | <i>Paeniglutamicibacter gangotriensis</i> | WP_007273049 |
| 04 | 2429-3748   | → | 439 | DNA polymerase V subunit UmuC                                               | 412/439 (94%) | <i>Paeniglutamicibacter gangotriensis</i> | WP_007273048 |
| 05 | 5079-4669   | ← | 136 | hypothetical protein, partial                                               | 95/135 (70%)  | <i>Arthrobacter sp. UCD-GKA</i>           | WP_071216150 |
| 06 | 5413-5114   | ← | 99  | DNA invertase, partial                                                      | 99/99 (100%)  | <i>Glutamicibacter sp. BW77</i>           | WP_096253936 |
| 07 | 5649-6020   | → | 123 | hypothetical protein                                                        | 46/126 (37%)  | <i>Arthrobacter sp. PAO19</i>             | WP_022875896 |
| 08 | 6065-7123   | → | 352 | hypothetical protein                                                        | 208/322 (65%) | <i>Arthrobacter sp. J3.40</i>             | WP_015061943 |
| 09 | 7837-7367   | ← | 156 | hypothetical protein                                                        | -/-           | none                                      | -            |
| 10 | 8784-9392   | → | 202 | hypothetical protein                                                        | 182/202 (90%) | <i>Paeniglutamicibacter gangotriensis</i> | WP_007273036 |
| 11 | 10652-9462  | ← | 396 | Fic family protein                                                          | 374/396 (94%) | <i>Paeniglutamicibacter gangotriensis</i> | WP_007273075 |
| 12 | 11069-11851 | → | 260 | dimethylmenaquinone methyltransferase                                       | 223/257 (87%) | <i>Arthrobacter sp. Leaf337</i>           | WP_055805518 |
| 13 | 11848-12843 | → | 331 | tripartite tricarboxylate transporter substrate binding protein TctC        | 253/330 (77%) | <i>Arthrobacter sp. UNC362MFTsu5.1</i>    | WP_028271781 |
| 14 | 12840-13340 | → | 166 | tripartite tricarboxylate transporter TctB                                  | 105/166 (63%) | <i>Arthrobacter sp. Leaf337</i>           | WP_055805524 |
| 15 | 13353-14867 | → | 504 | tripartite tricarboxylate transporter TctA                                  | 447/499 (90%) | <i>Arthrobacter sp. Leaf337</i>           | KQR64159     |
| 16 | 14879-15799 | ← | 306 | transcriptional regulator, LysR family                                      | 248/301 (82%) | <i>Arthrobacter sp. Leaf337</i>           | KQR64160     |
| 17 | 16013-16876 | → | 287 | transcriptional regulator, MurR/RpiR family                                 | 180/256 (70%) | <i>Arthrobacter sp. UNC362MFTsu5.1</i>    | WP_081818807 |
| 18 | 16873-18084 | → | 403 | MFS transporter                                                             | 279/393 (71%) | <i>Pseudarthrobacter siccitolerans</i>    | WP_050053759 |
| 19 | 20002-18656 | ← | 448 | MFS transporter                                                             | 231/442 (52%) | <i>Rhodococcus</i>                        | WP_072936912 |
| 20 | 21378-20005 | ← | 457 | aldehyde dehydrogenase                                                      | 251/454 (55%) | <i>Streptomyces sp. NBRC 109706</i>       | WP_062213628 |
| 21 | 21407-22177 | ← | 256 | dehydrogenase, 3-ketoacyl-(acyl-carrier-protein) reductase                  | 147/248 (59%) | <i>Arthrobacter sp. 161MFSha2.1</i>       | WP_018780036 |
| 22 | 22416-23198 | → | 260 | transcriptional regulator, IclR family                                      | 99/254 (39%)  | <i>Actinopolyspora saharensis</i>         | WP_092521740 |
| 23 | 24016-23195 | ← | 273 | transcriptional regulator, IclR family                                      | 92/238 (39%)  | <i>Rhodococcus opacus</i>                 | AII10570     |
| 24 | 25009-24032 | ← | 325 | phthalate dioxygenase reductase                                             | 262/325 (81%) | <i>Arthrobacter sp. UNC362MFTsu5.1</i>    | WP_028272367 |
| 25 | 25527-25012 | ← | 171 | hypothetical protein                                                        | 136/170 (80%) | <i>Arthrobacter sp. 68b</i>               | AKG47402     |
| 26 | 26730-25537 | ← | 397 | threonine dehydrogenase                                                     | 316/389 (81%) | <i>Arthrobacter crystallopoietes</i>      | WP_074703479 |
| 27 | 28042-26756 | ← | 428 | (2Fe-2S)-binding protein                                                    | 394/428 (92%) | <i>Arthrobacter crystallopoietes</i>      | WP_074703480 |
| 28 | 28217-29860 | → | 547 | transcriptional regulator, IclR family                                      | 293/545 (54%) | <i>Arthrobacter crystallopoietes</i>      | SDR29105     |
| 29 | 30300-31124 | → | 254 | transcriptional regulator, IclR family                                      | 105/264 (40%) | <i>Rhodococcus pyridinivorans</i>         | WP_094980998 |
| 30 | 31915-31121 | ← | 264 | transcriptional regulator, IclR family                                      | 102/225 (45%) | <i>Rhodococcus marinonascens</i>          | WP_084721780 |
| 31 | 32314-33339 | → | 341 | ABC transporter substrate-binding                                           | 195/332 (59%) | <i>Streptomyces sp. TP-A0874</i>          | WP_079127740 |
| 32 | 33387-34193 | → | 268 | ABC-type nitrate/sulfonate/bicarbonate transport system, permease component | 187/260 (72%) | <i>Streptomyces sp. TP-A0874</i>          | WP_079127741 |
| 33 | 34193-35053 | → | 286 | ABC transporter ATP-binding protein                                         | 186/263(71%)  | <i>Caballeronia fortuita</i>              | WP_061133805 |
| 34 | 35204-36436 | → | 410 | arabinose ABC transporter permease                                          | 161/392 (41%) | <i>Sinomonas atrocyanea</i>               | WP_066499825 |

|    |             |   |      |                                                         |                 |                                                       |              |
|----|-------------|---|------|---------------------------------------------------------|-----------------|-------------------------------------------------------|--------------|
| 35 | 41055-37630 | ← | 1141 | restriction endonuclease subunit R, type I EcoKI enzyme | 1012/1138 (89%) | <i>Arthrobacter sp. Leaf69</i>                        | WP_056432216 |
| 36 | 41417-41175 | ← | 80   | restriction endonuclease Mrr, part III                  | 79/80 (99%)     | <i>Arthrobacter sp. Leaf69</i>                        | WP_056431625 |
| 37 | 41815-41495 | ← | 106  | restriction endonuclease Mrr, part II                   | 79/100 (79%)    | <i>Arthrobacter sp. Leaf69</i>                        | WP_056431625 |
| 38 | 42110-41817 | ← | 97   | restriction endonuclease Mrr, part I                    | 76/97 (78%)     | <i>Arthrobacter sp. Leaf69</i>                        | WP_056431625 |
| 39 | 43249-42107 | ← | 380  | restriction endonuclease subunit S, type I EcoKI enzyme | 238/374 (64%)   | <i>Arthrobacter sp. 31Y</i>                           | WP_024818465 |
| 40 | 44790-43294 | ← | 498  | SAM-dependent DNA methyltransferase, type I RM system   | 442/497 (89%)   | <i>Arthrobacter sp. Leaf69</i>                        | WP_056431620 |
| 41 | 43294-44790 | → | 323  | hypothetical protein                                    | 123/172 (72%)   | <i>Arthrobacter sp. Soil764</i>                       | WP_056332725 |
| 42 | 46971-46096 | ← | 291  | hypothetical protein                                    | 112/266 (42%)   | <i>Arthrobacter sp. 9MFCol3.1</i>                     | WP_026536639 |
| 43 | 47261-47947 | → | 228  | hypothetical protein                                    | 189/228 (93%)   | <i>Glutamicibacter halophytocola</i>                  | WP_060703080 |
| 44 | 49446-48226 | ← | 406  | hypothetical protein                                    | 120/393 (31%)   | <i>Demequina aurantiaca</i>                           | WP_061964237 |
| 45 | 49859-49443 | ← | 138  | hypothetical protein                                    | 46/134 (34%)    | <i>Clavibacter michiganensis subsp. Michiganensis</i> | OU86942      |
| 46 | 50671-50086 | ← | 195  | DNA resolvase                                           | 181/189 (96%)   | <i>Arthrobacter sp. UCD-GKA</i>                       | WP_071216176 |
| 47 | 51571-51269 | ← | 100  | hypothetical protein                                    | 56/100 (56%)    | <i>Paeniglutamicibacter antarcticus</i>               | WP_068738518 |
| 48 | 52586-51912 | ← | 224  | hypothetical protein                                    | 73/139 (53%)    | <i>Arthrobacter sp. B6</i>                            | WP_066286544 |
| 49 | 53932-52934 | ← | 332  | peptidase                                               | 192/321 (60%)   | <i>Arthrobacter sp. UCD-GKA</i>                       | WP_071216184 |
| 50 | 54586-54044 | ← | 180  | hypothetical protein                                    | 93/181 (51%)    | <i>Arthrobacter sp. 9MFCol3.1</i>                     | WP_051532949 |
| 51 | 55257-54928 | ← | 109  | hypothetical protein                                    | 34/85 (40%)     | <i>Renibacterium salmoninarum</i>                     | WP_041684834 |
| 52 | 55374-55673 | → | 99   | resolvase/invertase, partial                            | 39/91 (43%)     | <i>Arthrobacter sp. L77</i>                           | WP_052274287 |
| 53 | 56197-55925 | ← | 90   | hypothetical protein                                    | -/-             | none                                                  | -            |
| 54 | 56346-56609 | → | 87   | hypothetical protein                                    | 53/84 (63%)     | <i>Arthrobacter sp. Soil762</i>                       | WP_056343145 |
| 55 | 56678-56821 | → | 47   | hypothetical protein                                    | 24/46 (52%)     | <i>Arthrobacter sp. M2012083</i>                      | WP_026005769 |
| 56 | 57183-56818 | ← | 121  | hypothetical protein                                    | 59/120 (49%)    | <i>Arthrobacter sp. Rue61a</i>                        | WP_014923458 |
| 57 | 57592-62076 | → | 1494 | conjugal transfer protein TraA                          | 920/1535 (60%)  | <i>Arthrobacter sp. Rue61a</i>                        | WP_014923459 |
| 58 | 63217-62168 | ← | 349  | hypothetical protein                                    | 195/324 (60%)   | <i>Glutamicibacter halophytocola</i>                  | WP_060700398 |
| 59 | 63586-63362 | ← | 74   | hypothetical protein                                    | -/-             | none                                                  | -            |
| 60 | 63708-64046 | → | 112  | hypothetical protein                                    | -/-             | none                                                  | -            |
| 61 | 64605-65102 | → | 165  | hypothetical protein                                    | -/-             | none                                                  | -            |
| 62 | 65648-67042 | → | 464  | transposase, IS1380 family                              | 355/464 (77%)   | <i>Arthrobacter sp. U41</i>                           | WP_083266399 |
| 63 | 67698-67195 | ← | 167  | hypothetical protein                                    | 136/172 (79%)   | <i>Arthrobacter sp. W1</i>                            | KWR70626     |
| 64 | 68991-67825 | ← | 388  | transposase, ISAs1 family                               | 222/388 (57%)   | <i>Arthrobacter alpinus</i>                           | WP_082357861 |
| 65 | 70126-69104 | ← | 340  | peptidase M23                                           | 233/304 (77%)   | <i>Paeniglutamicibacter antarcticus</i>               | WP_068735610 |
| 66 | 70880-70143 | ← | 245  | hypothetical protein                                    | 104/195 (53%)   | <i>Arthrobacter sp. KI72</i>                          | WP_079941686 |
| 67 | 72745-70877 | ← | 622  | conjugal transfer protein TraG                          | 377/592 (64%)   | <i>Arthrobacter sp. ZXY-2</i>                         | WP_071416994 |
| 68 | 74333-72765 | ← | 522  | conjugal ATP-binding protein                            | 337/517 (65%)   | <i>Tersicoccus sp. Bi-70</i>                          | WP_083701827 |
| 69 | 75958-74333 | ← | 541  | hypothetical protein                                    | 340/541 (63%)   | <i>Arthrobacter sp. Hiyo1</i>                         | GAP61402     |

|    |             |   |     |                                        |               |                                        |              |
|----|-------------|---|-----|----------------------------------------|---------------|----------------------------------------|--------------|
| 70 | 77508-75958 | ← | 516 | hypothetical protein                   | 261/481 (54%) | <i>Arthrobacter sp. KI72</i>           | WP_079941690 |
| 71 | 78175-77510 | ← | 221 | hypothetical protein                   | 79/220 (36%)  | <i>Arthrobacter sp. Hiyo1</i>          | WP_059390186 |
| 72 | 78540-78178 | ← | 120 | hypothetical protein                   | 66/120 (55%)  | <i>Arthrobacter sp. ZXY-2</i>          | AOY74439     |
| 73 | 79697-78537 | ← | 386 | partitioning protein                   | 215/382 (56%) | <i>Arthrobacter sp. Hiyo1</i>          | WP_059390184 |
| 74 | 79862-80185 | → | 107 | transcriptional regulator, ArsR family | 75/106 (71%)  | <i>Arthrobacter sp. UNC362MFTsu5.1</i> | WP_081818995 |
| 75 | 80305-81036 | → | 243 | hypothetical protein                   | 94/228 (41%)  | <i>Arthrobacter sp. QXT-31</i>         | WP_076798726 |
| 76 | 81083-81772 | → | 229 | hypothetical protein                   | 110/228 (48%) | <i>Tersicoccus sp. Bi-70</i>           | WP_076695439 |
| 77 | 81904-82140 | → | 78  | hypothetical protein                   | 66/77 (86%)   | <i>Arthrobacter sp. YC-RL1</i>         | WP_082123725 |
| 78 | 82324-84207 | → | 627 | hypothetical protein                   | 330/632 (52%) | <i>Arthrobacter sp. KI72</i>           | WP_079941819 |

**pA19BH1**
**pA19BH1\_p...**

|    |             |   |      |                                             |                 |                                             |              |
|----|-------------|---|------|---------------------------------------------|-----------------|---------------------------------------------|--------------|
| 01 | 300-1223    | → | 307  | partitioning protein ParA                   | 293/307 (95%)   | <i>Cryobacterium arcticum</i>               | WP_084021494 |
| 02 | 1220-1633   | → | 137  | partitioning protein ParB                   | 100/139 (72%)   | <i>Cryobacterium arcticum</i>               | ANP74904     |
| 03 | 1915-6816   | → | 1633 | DNA damage-inducible protein, helicase      | 1373/1624 (85%) | <i>Glaciibacter superstes</i>               | WP_022883363 |
| 04 | 7368-8138   | → | 256  | hypothetical protein                        | 99/147 (67%)    | <i>Leifsonia sp. 71-9</i>                   | OJX78854     |
| 05 | 8407-9471   | → | 354  | nucleotidyltransferase                      | 238/352 (68%)   | <i>Leifsonia sp. 71-9</i>                   | OJX78886     |
| 06 | 9459-9947   | → | 162  | hypothetical protein                        | 93/151 (62%)    | <i>Leifsonia sp. 71-9</i>                   | OJX78887     |
| 07 | 10007-10480 | → | 157  | hypothetical protein                        | 80/164 (49%)    | <i>Arthrobacter sp. TB 23</i>               | WP_019482522 |
| 08 | 11248-10649 | ← | 199  | invertase/recombinase                       | 175/196 (89%)   | <i>Microbacterium sp. SCN 71-17</i>         | ODT36231     |
| 09 | 14570-11712 | ← | 952  | NTPase                                      | 424/949 (45%)   | <i>Candidatus Frankia californiensis</i>    | SBW24504     |
| 10 | 15297-15022 | ← | 91   | hypothetical protein                        | 78/91 (86%)     | <i>Cryobacterium levicorallinum</i>         | WP_092450722 |
| 11 | 15482-16108 | → | 208  | transcriptional regulator, PadR family      | 148/212 (70%)   | <i>Cryobacterium arcticum</i>               | WP_084020817 |
| 12 | 16424-16966 | → | 180  | hypothetical protein                        | 91/172 (53%)    | <i>Gulosibacter molinativorax</i>           | WP_026935697 |
| 13 | 17002-21993 | → | 1663 | Adenine-specific DNA methylase, N12 class   | 1057/1610 (66%) | <i>Agromyces sp. Soil535</i>                | WP_056729902 |
| 14 | 22769-22419 | ← | 116  | hypothetical protein                        | 34/86 (40%)     | <i>Curtobacterium flaccumfaciens</i>        | WP_042539564 |
| 15 | 22952-26758 | → | 1268 | conjugal transfer protein TraA              | 737/1260 (58%)  | <i>Rathayibacter rathayi</i>                | SOE05907     |
| 16 | 28357-26828 | ← | 509  | hypothetical protein                        | 193/501 (39%)   | <i>Cryobacterium flavum</i>                 | WP_092341887 |
| 17 | 29365-28354 | ← | 343  | protein kinase                              | 186/342 (54%)   | <i>Microbacterium mangrovi</i>              | WP_082008124 |
| 18 | 29784-30176 | → | 130  | transcriptional regulator, XRE family       | 80/113 (71%)    | <i>Cryobacterium roopkundense</i>           | KGJ79262     |
| 19 | 30242-31291 | → | 349  | hypothetical protein                        | 273/344 (79%)   | <i>Cryobacterium arcticum</i>               | WP_066600569 |
| 20 | 31390-33144 | → | 584  | transposase, IS30 family                    | 435/584 (74%)   | <i>Arthrobacter sp. U41</i>                 | WP_083266386 |
| 21 | 34039-34812 | → | 257  | 3-oxoacyl-[acyl-carrier-protein] reductase  | 167/257 (65%)   | <i>Rugosibacter aromaticivorans</i>         | AJP47628     |
| 22 | 35799-34891 | ← | 302  | extradiol ring-cleavage dioxygenase         | 283/302 (94%)   | <i>Micrococcales bacterium 32-70-13</i>     | OYX57909     |
| 23 | 36213-36632 | ← | 139  | PIN domain-containing protein               | 126/138 (91%)   | <i>Cryobacterium sp. MLB-32</i>             | WP_051973804 |
| 24 | 37168-37794 | → | 208  | transcriptional regulator, TetR/AcrR family | 134/208 (64%)   | <i>Arthrobacter sp. U41</i>                 | WP_083266626 |
| 25 | 37791-39416 | → | 541  | drug resistance transporter                 | 469/529 (89%)   | <i>Arthrobacter sp. Leaf69</i>              | WP_056426022 |
| 26 | 39481-40110 | → | 209  | transcriptional regulator, TetR/AcrR family | 193/209 (92%)   | <i>Pseudarthrobacter phenanthrenivorans</i> | WP_013602978 |
| 27 | 40457-40966 | → | 169  | partial transposase of IS21 family, part 1  | 104/126 (83%)   | <i>Cryobacterium flavum</i>                 | SDN36336     |

|    |             |   |     |                                             |               |                                            |              |
|----|-------------|---|-----|---------------------------------------------|---------------|--------------------------------------------|--------------|
| 28 | 40860-41405 | → | 181 | partial transposase of IS21 family, part 2  | 86/93 (93%)   | <i>Arthrobacter sp. H20</i>                | WP_081743327 |
| 29 | 42502-41573 | ← | 309 | NADP-dependent oxidoreductase               | 193/310 (62%) | <i>Gordonia sp. HS-NH1</i>                 | WP_055476403 |
| 30 | 42606-43247 | → | 213 | transcriptional regulator, TetR/AcrR family | 140/202 (69%) | <i>Gordonia rubripertincta</i>             | ASR05659     |
| 31 | 43287-43838 | → | 183 | glutathione peroxidase                      | 130/158 (82%) | <i>Cellulomonas sp. KRMCY2</i>             | WP_024286154 |
| 32 | 44244-43843 | ← | 133 | partial, MFS transporter                    | 78/95 (82%)   | <i>Herbiconiux ginsengi</i>                | WP_092552320 |
| 33 | 45042-44329 | ← | 237 | succinoglycan biosynthesis protein ExoA     | 127/232 (55%) | <i>Micrococcales bacterium 72-143</i>      | OJX66848     |
| 34 | 45943-45122 | ← | 273 | lysophospholipase                           | 153/219 (70%) | <i>Kocuria sp. WN036</i>                   | WP_095650796 |
| 35 | 46842-46267 | ← | 191 | transcriptional regulator, TetR/AcrR family | 96/187 (51%)  | <i>Streptomyces mirabilis</i>              | WP_037718496 |
| 36 | 46990-49395 | → | 801 | drug exporter, membrane protein YdfJ        | 507/761 (67%) | <i>Micrococcales bacterium 32-70-13</i>    | OYX57908     |
| 37 | 50001-49759 | ← | 80  | hypothetical protein                        | 56/78 (72%)   | <i>Cryobacterium luteum</i>                | WP_092111469 |
| 38 | 50261-50040 | ← | 73  | hypothetical protein                        | 65/70 (93%)   | <i>Cryobacterium psychrotolerans</i>       | WP_092324200 |
| 39 | 52267-50549 | ← | 572 | conjugal transfer protein TraD/TraG         | 232/503 (46%) | <i>Arthrobacter sp. ZXY-2</i>              | WP_071416994 |
| 40 | 53700-52270 | ← | 476 | conjugal transfer ATPase                    | 242/466 (52%) | <i>Leifsonia sp. NCR5</i>                  | WP_085370153 |
| 41 | 55313-53697 | ← | 538 | conjugal transfer ATP-binding protein TraC  | 297/492 (60%) | <i>Microbacterium mangrove</i>             | WP_052226535 |
| 42 | 56809-55313 | ← | 498 | conjugal transfer membrane protein          | 287/498 (58%) | <i>Microbacterium sp. SCN 69-37</i>        | ODT25947     |
| 43 | 58214-56826 | ← | 462 | conjugal transfer protein                   | 179/427 (42%) | <i>Microbacterium sp. SCN 69-37</i>        | ODT25991     |
| 44 | 58518-58216 | ← | 100 | hypothetical protein                        | 49/93 (53%)   | <i>Microbacterium trichothecenolyticum</i> | WP_045299576 |
| 45 | 59147-58542 | ← | 201 | murein hydrolase activator EnvC precursor   | 72/134 (54%)  | <i>Cnuibacter physcomitrellae</i>          | WP_085021889 |
| 46 | 59911-59150 | ← | 253 | hypothetical protein                        | 87/239 (36%)  | <i>Microbacterium sediminis</i>            | WP_067028783 |
| 47 | 60191-60514 | → | 107 | transcriptional regulator, ArsR family      | 46/107 (43%)  | <i>Arthrobacter sp. 31Cvi3.IE</i>          | WP_079581666 |
| 48 | 60573-60809 | → | 78  | hypothetical protein                        | 41/78 (53%)   | <i>Herbiconiux ginseng</i>                 | WP_092558271 |
| 49 | 61054-62889 | → | 611 | hypothetical protein                        | 439/610 (72%) | <i>Cryobacterium flavum</i>                | SDO33730     |
| 50 | 63199-63621 | → | 140 | hypothetical protein                        | 103/136 (76%) | <i>Cryobacterium luteum</i>                | WP_092111893 |
| 51 | 64993-63875 | ← | 372 | hypothetical protein                        | 268/369 (73%) | <i>Cryobacterium roopkundense</i>          | WP_035839023 |
| 52 | 65249-66832 | → | 527 | transposase, ISNCY family                   | 463/525 (88%) | <i>Cryobacterium sp. MLB-32</i>            | WP_051973528 |
| 53 | 66829-67599 | → | 256 | ATP-binding protein                         | 240/256 (94%) | <i>Cryobacterium sp. MLB-32</i>            | KFF59070     |
| 54 | 67667-69343 | → | 558 | hypothetical protein                        | 425/557 (76%) | <i>Cryobacterium sp. MLB-32</i>            | WP_051973529 |

**pA44BH1**
**pA44BH1\_p...**

|    |           |   |     |                                 |               |                                      |              |
|----|-----------|---|-----|---------------------------------|---------------|--------------------------------------|--------------|
| 01 | 453-1268  | → | 271 | partitioning protein ParA       | 231/370 (86%) | <i>Arthrobacter</i>                  | WP_069694809 |
| 02 | 1273-1689 | → | 138 | partitioning protein ParB       | 113/141 (85%) | <i>Arthrobacter</i>                  | WP_083261974 |
| 03 | 2121-2804 | → | 227 | hypothetical protein            | 124/227 (55%) | <i>Arthrobacter alpinus</i>          | WP_062008985 |
| 04 | 2951-3565 | → | 204 | KfrA protein                    | 176/207 (85%) | <i>Arthrobacter alpinus</i>          | WP_062008987 |
| 05 | 4127-3804 | ← | 107 | hypothetical protein, partial   | 83/107 (78%)  | <i>Arthrobacter crystallopoietes</i> | WP_074698543 |
| 06 | 5692-4400 | ← | 430 | transposase, ISL3 family        | 266/431 (62%) | <i>Janibacter terrae</i>             | WP_032492314 |
| 07 | 7620-6118 | ← | 500 | haloacid dehalogenase (HAD)     | 369/484 (76%) | <i>Arthrobacter sp. SRS-W-1-2016</i> | WP_078106477 |
| 08 | 8058-8765 | → | 235 | resolvase/invertase/recombinase | 165/207 (80%) | <i>Arthrobacter sp. H5</i>           | WP_081746535 |
| 09 | 8801-9196 | → | 131 | hypothetical protein            | 71/131 (54%)  | <i>Arthrobacter sp. H5</i>           | WP_035775518 |

|    |             |   |      |                                                         |                 |                                            |              |
|----|-------------|---|------|---------------------------------------------------------|-----------------|--------------------------------------------|--------------|
| 10 | 9292-14256  | → | 1654 | adenine-specific DNA methylase, N12 class               | 1183/1639 (72%) | <i>Arthrobacter subterraneus</i>           | SDI69836     |
| 11 | 15094-14705 | ← | 129  | hypothetical protein                                    | 71/96 (74%)     | <i>Arthrobacter sp. SRS-W-1-2016</i>       | WP_078106456 |
| 12 | 15343-15735 | → | 130  | mobilization protein MobC                               | 115/130 (88%)   | <i>Arthrobacter sp. 31.31</i>              | WP_015061717 |
| 13 | 15735-17294 | → | 519  | mobilization protein, relaxase                          | 466/519 (90%)   | <i>Arthrobacter sp. TB 26</i>              | WP_024366420 |
| 14 | 17312-18424 | → | 370  | hypothetical protein colicin imp                        | 223/371 (60%)   | <i>Arthrobacter nitrophenolicus</i>        | WP_009359335 |
| 15 | 18874-19770 | → | 298  | DNA methyltransferase                                   | 207/281 (74%)   | <i>Microbacterium trichothecenolyticum</i> | WP_045296087 |
| 16 | 19883-21655 | → | 590  | restriction enzyme subunit McrB                         | 294/551 (53%)   | <i>Microbacterium sp. Cr-K29</i>           | WP_029260290 |
| 17 | 21645-22958 | → | 437  | restriction endonuclease McrBC, regulatory subunit McrC | 246/430 (57%)   | <i>Microbacterium sp. Cr-K29</i>           | WP_029260291 |
| 18 | 24014-23100 | ← | 304  | hypothetical protein                                    | 83/247 (34%)    | <i>Nocardioides sp. Leaf285</i>            | WP_056862662 |
| 19 | 24188-25216 | → | 342  | hypothetical protein                                    | 280/342 (82%)   | <i>Arthrobacter crystallopoietes</i>       | WP_083339472 |
| 20 | 25765-25349 | ← | 138  | hypothetical protein                                    | 115/140 (82%)   | <i>Arthrobacter sp. J3-37</i>              | WP_015062378 |
| 21 | 27527-25758 | ← | 589  | conjugal transfer protein TraG                          | 529/589 (90%)   | <i>Arthrobacter sp. SRS-W-1-2016</i>       | WP_078106445 |
| 22 | 29119-27527 | ← | 530  | ATP/GTP-binding protein                                 | 503/530 (95%)   | <i>Arthrobacter sp. TB 26</i>              | WP_024366415 |
| 23 | 30630-29119 | ← | 503  | hypothetical membrane protein                           | 478/503 (95%)   | <i>Arthrobacter sp. TB 26</i>              | WP_024366414 |
| 24 | 31975-30632 | ← | 447  | hypothetical protein                                    | 312/447 (70%)   | <i>Arthrobacter sp. Soil764</i>            | WP_056331991 |
| 25 | 32703-31975 | ← | 242  | hypothetical protein                                    | 172/244 (70%)   | <i>Arthrobacter sp. 31.31</i>              | WP_015061728 |
| 26 | 33002-32715 | ← | 95   | hypothetical protein                                    | 78/95 (82%)     | <i>Arthrobacter sp. TB 26</i>              | WP_024366463 |
| 27 | 33640-33017 | ← | 207  | hypothetical protein                                    | 166/207 (80%)   | <i>Arthrobacter sp. TB 26</i>              | WP_024366462 |
| 28 | 33755-34018 | → | 87   | DNA-binding protein                                     | 73/87 (84%)     | <i>Arthrobacter sp. TB 26</i>              | WP_024366461 |
| 29 | 34050-35117 | → | 355  | amidase                                                 | 296/347 (85%)   | <i>Arthrobacter sp. 31.31</i>              | WP_015061732 |
| 30 | 35129-35647 | → | 172  | hypothetical protein                                    | 148/172 (86%)   | <i>Arthrobacter sp. TB 26</i>              | WP_024366460 |
| 31 | 35661-37094 | → | 477  | partitioning protein ParA                               | 407/471 (86%)   | <i>Arthrobacter sp. TB 26</i>              | WP_024366459 |
| 32 | 37152-37382 | → | 76   | hypothetical protein                                    | 60/76 (79%)     | <i>Arthrobacter sp. J3-37</i>              | WP_015062388 |
| 33 | 37500-38768 | → | 422  | hypothetical protein                                    | 247/385 (64%)   | <i>Arthrobacter sp. Chr15</i>              | WP_012311476 |
| 34 | 39453-38794 | ← | 199  | hypothetical protein                                    | 108/184 (59%)   | <i>Arthrobacter sp. A3</i>                 | WP_058945698 |
| 35 | 40029-39736 | ← | 97   | hypothetical protein                                    | 56/97 (58%)     | <i>Arthrobacter alpinus</i>                | WP_074710841 |
| 36 | 40413-40676 | → | 87   | NrdH-redoxin                                            | 62/85 (73%)     | <i>Sinomonas mesophila</i>                 | WP_077490863 |

**pA48BH1**
**pA48BH1\_p...**

|    |           |   |     |                                  |               |                                      |              |
|----|-----------|---|-----|----------------------------------|---------------|--------------------------------------|--------------|
| 01 | 441-1256  | → | 271 | partitioning protein ParA        | 231/370 (86%) | <i>Arthrobacter</i>                  | WP_069694809 |
| 02 | 1261-1677 | → | 138 | partitioning protein ParB        | 113/141 (85%) | <i>Arthrobacter</i>                  | WP_083261974 |
| 03 | 2109-2792 | → | 227 | hypothetical protein             | 124/227 (55%) | <i>Arthrobacter alpinus</i>          | WP_062008985 |
| 04 | 2939-3553 | → | 204 | KfrA protein                     | 176/207 (85%) | <i>Arthrobacter alpinus</i>          | WP_062008987 |
| 05 | 4115-3792 | ← | 107 | hypothetical protein, partial    | 83/107 (78%)  | <i>Arthrobacter crystallopoietes</i> | WP_074698543 |
| 06 | 5680-4388 | ← | 430 | transposase, ISL3 family         | 266/431 (62%) | <i>Janibacter terrae</i>             | WP_032492314 |
| 07 | 6945-6106 | ← | 279 | haloacid dehalogenase, truncated | 188/263 (71%) | <i>Arthrobacter sp. SRS-W-1-2016</i> | WP_078106477 |
| 08 | 7608-6970 | ← | 212 | haloacid dehalogenase, truncated | 169/212 (80%) | <i>Arthrobacter sp. SRS-W-1-2016</i> | WP_078106477 |



|    |             |   |      |                                                         |                 |                                            |              |
|----|-------------|---|------|---------------------------------------------------------|-----------------|--------------------------------------------|--------------|
| 09 | 8088-8753   | → | 235  | resolvase/invertase/recombinase                         | 165/207 (80%)   | <i>Arthrobacter sp. H5</i>                 | WP_081746535 |
| 10 | 8789-9184   | → | 131  | hypothetical protein                                    | 71/131 (54%)    | <i>Arthrobacter sp. H5</i>                 | WP_035775518 |
| 11 | 9223-14244  | → | 1654 | adenine-specific DNA methylase                          | 1183/1639 (72%) | <i>Arthrobacter subterraneus</i>           | SDI69836     |
| 12 | 15082-14693 | ← | 129  | hypothetical protein                                    | 71/96 (74%)     | <i>Arthrobacter sp. SRS-W-1-2016</i>       | WP_078106456 |
| 13 | 15331-15723 | → | 130  | mobilization protein MobC                               | 115/130 (88%)   | <i>Arthrobacter sp. 31.31</i>              | WP_015061717 |
| 14 | 15723-17282 | → | 519  | mobilization protein, relaxase                          | 466/519 (90%)   | <i>Arthrobacter sp. TB 26</i>              | WP_024366420 |
| 15 | 17300-18412 | → | 370  | hypothetical protein colicin imp                        | 223/371 (60%)   | <i>Arthrobacter nitrophenolicus</i>        | WP_009359335 |
| 16 | 18844-19758 | → | 298  | DNA methylase                                           | 207/281 (74%)   | <i>Microbacterium trichothecenolyticum</i> | WP_045296087 |
| 17 | 19871-21643 | → | 590  | restriction enzyme subunit McrB                         | 294/551 (53%)   | <i>Microbacterium sp. Cr-K29</i>           | WP_029260290 |
| 18 | 21633-22946 | → | 437  | restriction endonuclease McrBC, regulatory subunit McrC | 246/430 (57%)   | <i>Microbacterium sp. Cr-K29</i>           | WP_029260291 |
| 19 | 24002-23088 | ← | 304  | hypothetical protein                                    | 83/247 (34%)    | <i>Nocardioides sp. Leaf285</i>            | WP_056862662 |
| 20 | 24176-25204 | → | 342  | hypothetical protein                                    | 280/342 (82%)   | <i>Arthrobacter crystallopoietes</i>       | WP_083339472 |
| 21 | 25753-25337 | ← | 138  | hypothetical protein                                    | 115/140 (82%)   | <i>Arthrobacter sp. J3-37</i>              | WP_015062378 |
| 22 | 27515-25746 | ← | 589  | conjugal transfer protein TraG                          | 529/589 (90%)   | <i>Arthrobacter sp. SRS-W-1-2016</i>       | WP_078106445 |
| 23 | 29107-27515 | ← | 530  | ATP/GTP-binding protein                                 | 503/530 (95%)   | <i>Arthrobacter sp. TB 26</i>              | WP_024366415 |
| 24 | 30618-29107 | ← | 503  | hypothetical membrane protein                           | 478/503 (95%)   | <i>Arthrobacter sp. TB 26</i>              | WP_024366414 |
| 25 | 31963-30620 | ← | 447  | hypothetical protein                                    | 312/447 (70%)   | <i>Arthrobacter sp. Soil764</i>            | WP_056331991 |
| 26 | 32691-31963 | ← | 242  | hypothetical protein                                    | 172/244 (70%)   | <i>Arthrobacter sp. 31.31</i>              | WP_015061728 |
| 27 | 32990-32703 | ← | 95   | hypothetical protein                                    | 78/95 (82%)     | <i>Arthrobacter sp. TB 26</i>              | WP_024366463 |
| 28 | 33628-33005 | ← | 207  | hypothetical protein                                    | 166/207 (80%)   | <i>Arthrobacter sp. TB 26</i>              | WP_024366462 |
| 29 | 33743-34006 | → | 87   | DNA-binding protein                                     | 73/87 (84%)     | <i>Arthrobacter sp. TB 26</i>              | WP_024366461 |
| 30 | 34038-35105 | → | 355  | amidase                                                 | 296/347 (85%)   | <i>Arthrobacter sp. 31.31</i>              | WP_015061732 |
| 31 | 35117-35635 | → | 172  | hypothetical protein                                    | 148/172 (86%)   | <i>Arthrobacter sp. TB 26</i>              | WP_024366460 |
| 32 | 35649-37082 | → | 477  | partitioning protein ParA                               | 407/471 (86%)   | <i>Arthrobacter sp. TB 26</i>              | WP_024366459 |
| 33 | 37140-37370 | → | 76   | hypothetical protein                                    | 60/76 (79%)     | <i>Arthrobacter sp. J3-37</i>              | WP_015062388 |
| 34 | 37488-38756 | → | 422  | hypothetical protein                                    | 247/385 (64%)   | <i>Arthrobacter sp. Chr15</i>              | WP_012311476 |
| 35 | 39381-38782 | ← | 199  | hypothetical protein                                    | 108/184 (59%)   | <i>Arthrobacter sp. A3</i>                 | WP_058945698 |
| 36 | 40017-39724 | ← | 97   | hypothetical protein                                    | 56/97 (58%)     | <i>Arthrobacter alpinus</i>                | WP_074710841 |
| 37 | 40399-40662 | → | 87   | NrdH-redoxin                                            | 62/85 (73%)     | <i>Sinomonas mesophila</i>                 | WP_077490863 |
