# Supplementary material for: Insight Into the Diversity and Possible Role of Plasmids in the Adaptation of Psychrotolerant and Metalotolerant Arthrobacter spp. to Extreme Antarctic Environments
Source: PubMed Central journal article supplement (PMC6305408; doi:10.3389/fmicb.2018.03144), 2018-12-18
Supplement: Table_4.pdf [file Table_4.pdf]

### Supplementary Material

## Insight into the Diversity and Possible Role of Plasmids in the Adaptation of Psychrotolerant and Metalotolerant *Arthrobacter* spp. to Extreme Antarctic Environments

Krzysztof Romaniuk, Piotr Golec, Lukasz Dziewit\*

\* Correspondence: Dr. Lukasz Dziewit: ldziewit@biol.uw.edu.pl

**TABLE S4.** Partitioning systems (including sequences of predicted partitioning sites – *parS*) identified within the ANT plasmids.

| Plasmid name | <i>par</i> genes (coordinates)          | Sequences and coordinates of putative direct repeats (DR) of <i>parS</i> site <sup>a</sup>                                            | Homologous PAR system (found based on the best BLASTp hit to the ParA protein)   |
|--------------|-----------------------------------------|---------------------------------------------------------------------------------------------------------------------------------------|----------------------------------------------------------------------------------|
| pA2H2        | <i>pA2H2_49-50</i><br>(51,902 – 52,672) | DR.1: 51851-ATGCAA-51856<br>DR.2: 51871-ATGAAA-51876<br>DR.3: 51879-ATGAAA-51884<br>DR.4: 51902-ATGCAA-51907<br><br>Consensus: ATGMAA | <i>Arthrobacter</i> sp. MA-N2 [GenBank: WP_028268205 and WP_028268206]           |
| pA8H1        | <i>pA8H1_01-02</i><br>(78 – 961)        | DR.1: 5-CACTTACTCATCTACT-20<br>DR.2: 46-CATTACTCACCTCT-61<br><br>Consensus: CAYTTACTCAYCYWCT                                          | <i>Glutamicibacter</i> sp. BW77 [GenBank: WP_096253931 and WP_096253932]         |
| pA19BH1      | <i>pA19BH1_01-02</i><br>(300 – 1,633)   | DR.1: 198-CAGTAAAAGCAGCA-211<br>DR.2: 216-CAGCAAAAAGCAGCA-229<br>DR.3: 252-CAGCATTAGCTGTA-265<br><br>Consensus: CAGYAWWAGCWGYA        | <i>Cryobacterium arcticum</i> plasmid pP27867_2 [GenBank: ANP74904 and ANP74905] |
| pA40H1       | <i>pA40H1_01-02</i><br>(90 – 1,138)     | DR.1: 27-AATCTTTC-34<br>DR.2: 39-AATCTTTC-46<br>DR.3: 63-AATCTTTC-70<br><br>Consensus: AATCTTTC                                       | <i>Arthrobacter</i> sp. MA-N2 [GenBank: WP_028268205 and WP_028268206]           |
| pA40H2       | <i>pA40H2_01-02</i><br>(241 – 1,397)    | DR.1: 174-CAAGTAATGC-183<br>DR.2: 201-CAAGTAATAC-210<br>DR.3: 219-CAAGTACTAC-228<br><br>Consensus: CAAGTAMTRC                         | <i>Kocuria marina</i> [GenBank: KHE74185 and KHE74186]                           |
| pA44BH1      | <i>pA44BH1_01-02</i><br>(453 – 1,689)   | DR.1: 383-GTGAATGTC-392<br>DR.2: 393-GTGAATTGC-402<br><br>Consensus: GTGAATKGC                                                        | <i>Arthrobacter</i> sp. 31.31 [GenBank: WP_015061701 and WP_015061702]           |
| pA48BH1      | <i>pA48BH1_01-02</i><br>(441 – 1,677)   | DR.1: 371-GTGAATGTC-380<br>DR.2: 381-GTGAATTGC-390<br><br>Consensus: GTGAATKGC                                                        | <i>Arthrobacter</i> sp. 31.31 [GenBank: WP_015061701 and WP_015061702]           |
| pA58H1       | <i>pA58H1_01-02</i><br>(172 – 1,622)    | DR.1: 127-AATCAGCA-134<br>DR.2: 146-AATCACCA-153<br><br>Consensus: AATCASCA                                                           | <i>Microbacterium esteraromaticum</i> [GenBank: WP_087130340 and WP_087130341]   |
| pA58H2       | <i>pA58H2_01-02</i><br>(276 – 1,046)    | DR2.1: 181-CTTGACGTC-189<br>DR2.2: 208-CTTACTTTC-216<br>DR2.2: 240-CTTGCTATC-248<br><br>Consensus: CTRMYDTC                           | <i>Kocuria polaris</i> [GenBank: KHD96206 and KHD96206]                          |
| pA58H3       | <i>pA58H3_01-02</i><br>(248 – 1,404)    | DR.1: 174-CAAGTAATGC-183<br>DR.2: 208-CAAGTAATAC-217<br>DR.3: 226-CAAGTACTAC-235<br><br>Consensus: CAAGTAMTRC                         | <i>Kocuria marina</i> [GenBank: KHE74185 and KHE74186]                           |

<sup>a</sup> Sequences shown in the 5' to 3' orientation.
