# Supplementary material for: Insight Into the Diversity and Possible Role of Plasmids in the Adaptation of Psychrotolerant and Metalotolerant Arthrobacter spp. to Extreme Antarctic Environments
Source: PubMed Central journal article supplement (PMC6305408; doi:10.3389/fmicb.2018.03144), 2018-12-18
Supplement: Table_5.pdf [file Table_5.pdf]

## *Supplementary Material*

# Insight into the Diversity and Possible Role of Plasmids in the Adaptation of Psychrotolerant and Metalotolerant *Arthrobacter* spp. to Extreme Antarctic Environments

Krzysztof Romaniuk, Piotr Golec, Lukasz Dziewit\*

\* Correspondence: Dr. Lukasz Dziewit: ldziewit@biol.uw.edu.pl

**TABLE S5.** Summary of phenotypic modules found within the ANT plasmids.

| Plasmid name                                                      | Protein    | Predicted protein function [Enzyme commission number]                          |
|-------------------------------------------------------------------|------------|--------------------------------------------------------------------------------|
| <b><i>Protection against UV radiation</i></b>                     |            |                                                                                |
| pA2H2                                                             | pA2H2_p51, | DNA-directed DNA polymerase subunit UmuD, COG1974                              |
|                                                                   | pA2H2_p59  | DNA-directed DNA polymerase subunit UmuC, COG0389 [EC: 2.7.7.7]                |
| pA8H1                                                             | pA8H1_p03, | DNA-directed DNA polymerase subunit UmuD, COG1974                              |
|                                                                   | pA8H1_p21  | DNA-directed DNA polymerase subunit UmuC, COG0389 [EC: 2.7.7.7]                |
| pA40H2                                                            | pA40H2_p03 | DNA-directed DNA polymerase subunit UmuD, COG1974                              |
|                                                                   | pA40H2_p11 | DNA-directed DNA polymerase subunit UmuC, COG0389 [EC: 2.7.7.7]                |
| pA58H3                                                            | pA58H3_p03 | DNA-directed DNA polymerase subunit UmuD, COG1974                              |
|                                                                   | pA58H3_p04 | DNA-directed DNA polymerase subunit UmuC, COG0389 [EC: 2.7.7.7]                |
| <b><i>Uptake and utilisation of various organic compounds</i></b> |            |                                                                                |
| pA2H2                                                             | pA2H2_p16  | ABC-type lipoprotein export system, ATPase component, COG1136 [EC: 3.6.3.28]   |
|                                                                   | pA2H2_p17  | ABC-type antimicrobial peptide transport system, permease component, COG0577   |
|                                                                   | pA2H2_p18  | TetR family transcriptional regulator                                          |
| pA2H2                                                             | pA2H2_p20  | MMPL family transporter                                                        |
|                                                                   | pA2H2_p21  | TetR/AcrR family transcriptional regulator, COG1309                            |
|                                                                   | pA2H2_p22  | drug resistance transporter, EmrB/QacA subfamily                               |
|                                                                   | pA2H2_p23  | TetR family transcriptional regulator                                          |
| pA8H1                                                             | pA8H1_p12  | laminarinase, glycoside hydrolase, COG2273                                     |
| pA58H3                                                            | pA58H3_p13 | tripartite tricarboxylate transporter substrate binding protein, COG3181       |
|                                                                   | pA58H3_p14 | tripartite tricarboxylate transporter TctB                                     |
|                                                                   | pA58H3_p15 | tripartite tricarboxylate transporter permease, TctA, COG3333                  |
|                                                                   | pA58H3_p16 | LysR family transcriptional regulator, COG0583                                 |
| pA58H3                                                            | pA58H3_p17 | major facilitator superfamily transporter                                      |
|                                                                   | pA58H3_p18 | MurR/RpiR family transcriptional regulator, COG1737                            |
| pA58H3                                                            | pA58H3_p19 | NAD(P)-dependent dehydrogenase, COG1028 [EC: 1.1.1.-]                          |
|                                                                   | pA58H3_p20 | aldehyde dehydrogenase, COG1022, [EC: 1.2.1.3]                                 |
|                                                                   | pA58H3_p21 | major facilitator superfamily transporter, COG2814                             |
|                                                                   | pA58H3_p22 | IclR family transcriptional regulator, COG1414                                 |
|                                                                   | pA58H3_p23 | IclR family transcriptional regulator, COG1414                                 |
|                                                                   | pA58H3_p24 | Phthalate 4,5-dioxygenase, COG1018 [EC: 1.14.12.7]                             |
|                                                                   | pA58H3_p25 | hypothetical protein                                                           |
|                                                                   | pA58H3_p26 | L-threonine 3-dehydrogenase, COG1063 [EC: 1.1.1.103]                           |
|                                                                   | pA58H3_p27 | aromatic ring-hydroxylating dioxygenase subunit alpha, COG4638 [EC: 1.14.12.7] |
| pA58H3                                                            | pA58H3_p32 | taurine transporter substrate binding subunit TauA, COG0715                    |
|                                                                   | pA58H3_p33 | taurine ABC transporter permease TauC, COG0600 [EC: 3.6.3.31]                  |
|                                                                   | pA58H3_p34 | taurine transporter TauB, COG:1116                                             |
|                                                                   | pA58H3_p35 | arabinose ABC transporter permease                                             |

|                                                            |                                                                                                              |                                                                                                                                                                                                                                                                                                                                                                                                  |
|------------------------------------------------------------|--------------------------------------------------------------------------------------------------------------|--------------------------------------------------------------------------------------------------------------------------------------------------------------------------------------------------------------------------------------------------------------------------------------------------------------------------------------------------------------------------------------------------|
| pA19BH1                                                    | pA19BH1_p21<br>pA19BH1_p22                                                                                   | short-chain dehydrogenase, COG1028<br>Aromatic ring-opening dioxygenase, catalytic subunit, COG3384 [EC: 1.13.11.29]                                                                                                                                                                                                                                                                             |
| pA19BH1                                                    | pA19BH1_p24<br>pA19BH1_p25<br>pA19BH1_p26<br>pA19BH1_p36                                                     | TetR family transcriptional regulator<br>drug resistance transporter, EmrB/QacA subfamily<br>TetR/AcrR family transcriptional regulator, COG1309<br>MMPL family transporter                                                                                                                                                                                                                      |
| <b><i>Transport of heavy metals</i></b>                    |                                                                                                              |                                                                                                                                                                                                                                                                                                                                                                                                  |
| pA2H2                                                      | pA2H2_p55<br>pA2H2_p56                                                                                       | tellurium resistance protein TerC, COG0861<br>putative cation transporting ATPase                                                                                                                                                                                                                                                                                                                |
| pA8H1                                                      | pA8H1_p16                                                                                                    | tellurium resistance protein TerC, COG0861,                                                                                                                                                                                                                                                                                                                                                      |
| pA8H1                                                      | pA8H1_p07<br>pA8H1_p08                                                                                       | tellurium resistance protein TerC, COG0861<br>putative cation transporting ATPase                                                                                                                                                                                                                                                                                                                |
| pA40H2                                                     | pA40H2_p07<br>pA40H2_p08                                                                                     | tellurium resistance protein TerC, COG0861<br>putative cation transporting ATPase                                                                                                                                                                                                                                                                                                                |
| pA40H1                                                     | pA40H1_p55<br>pA40H1_p56<br>pA40H1_p57                                                                       | copper chaperone CopZ, COG2608<br>heavy metal-binding domain-containing protein<br>copper-(or silver)-translocating P-type ATPase, COG2217 [EC: 3.6.3.53]                                                                                                                                                                                                                                        |
| <b><i>Sulfur detoxification and energy acquisition</i></b> |                                                                                                              |                                                                                                                                                                                                                                                                                                                                                                                                  |
| pA8H1                                                      | pA8H1_p33<br>pA8H1_p34                                                                                       | SulP family inorganic anion transporter, sulfate permease, COG0659<br>MerR family DNA-binding transcriptional regulator, COG0789                                                                                                                                                                                                                                                                 |
| pA8H1                                                      | pA8H1_p35<br>pA8H1_p36<br>pA8H1_p37<br>pA8H1_p38<br>pA8H1_p39<br>pA8H1_p40<br>pA8H1_p41<br>pA8H1_p42         | FrmR family DNA-binding transcriptional regulator, COG1937<br>hypothetical protein<br>persulfide dioxygenase A, COG0491 [EC: 1.13.11.18]<br>rhodanese-related sulfurtransferase, COG0607<br>rhodanese-related sulfurtransferase, COG0607<br>sulfite exporter TauE/SafE, COG0730<br>major facilitator superfamily transporter<br>hypothetical protein, uncharacterized conserved protein, COG3439 |
| pA58H2                                                     | pA58H2_p19<br>pA58H2_p20<br>pA58H2_p21<br>pA58H2_p22<br>pA58H2_p23                                           | intracellular sulfur oxidation, DsrE/DsrF, COG1416<br>cytochrome C biogenesis protein transmembrane region, COG0785<br>thiol-disulfide oxidoreductase, COG1651<br>Cytochrome c-type biogenesis protein CcdA<br>predicted transcriptional regulator, COG3682                                                                                                                                      |
| pA58H2                                                     | pA58H2_p24<br>pA58H2_p25<br>pA58H2_p26<br>pA58H2_p27<br>pA58H2_p28<br>pA58H2_p29<br>pA58H2_p30<br>pA58H2_p31 | hypothetical protein, uncharacterized conserved protein,<br>major facilitator superfamily transporter<br>sulfite exporter TauE/SafE, COG0730<br>rhodanese-related sulfurtransferase, COG0607<br>rhodanese-related sulfurtransferase, COG0607<br>persulfide dioxygenase A, COG0491 [EC: 1.13.11.18]<br>hypothetical protein<br>COG3439FrmR family DNA-binding transcriptional regulator, COG1937  |
| pA40H2                                                     | pA40H2_p27<br>pA40H2_p28                                                                                     | SulP family inorganic anion transporter, sulfate permease, COG0659<br>MerR family DNA-binding transcriptional regulator, COG0789                                                                                                                                                                                                                                                                 |
| pA40H2                                                     | pA40H2_p29<br>pA40H2_p30<br>pA40H2_p31<br>pA40H2_p32<br>pA40H2_p33<br>pA40H2_p34<br>pA40H2_p35<br>pA40H2_p36 | FrmR family DNA-binding transcriptional regulator, COG1937<br>hypothetical protein<br>persulfide dioxygenase A, COG0491 [EC: 1.13.11.18]<br>rhodanese-related sulfurtransferase, COG0607<br>rhodanese-related sulfurtransferase, COG0607<br>sulfite exporter TauE/SafE, COG0730<br>major facilitator superfamily transporter<br>hypothetical protein, uncharacterized conserved protein, COG3439 |
| pA40H2                                                     | pA58H2_p37<br>pA58H2_p38<br>pA58H2_p39<br>pA58H2_p40<br>pA58H2_p41                                           | predicted transcriptional regulator, COG3682<br>Cytochrome c-type biogenesis protein CcdA<br>thiol-disulfide oxidoreductase, COG1651<br>cytochrome C biogenesis protein transmembrane region, COG0785<br>intracellular sulfur oxidation protein, DsrE/DsrF, COG1416                                                                                                                              |
