# Supplementary material for: Insight Into the Diversity and Possible Role of Plasmids in the Adaptation of Psychrotolerant and Metalotolerant Arthrobacter spp. to Extreme Antarctic Environments
Source: PubMed Central journal article supplement (PMC6305408; doi:10.3389/fmicb.2018.03144), 2018-12-18
Supplement: Table_7.pdf [file Table_7.pdf]

## *Supplementary Material*

# Insight into the Diversity and Possible Role of Plasmids in the Adaptation of Psychrotolerant and Metalotolerant *Arthrobacter* spp. to Extreme Antarctic Environments

Krzysztof Romaniuk, Piotr Golec, Lukasz Dziewit\*

\* **Correspondence:** Dr. Lukasz Dziewit: ldziewit@biol.uw.edu.pl

**TABLE S7.** Summary of plasmids (of cold-active bacteria) that carry phenotypic modules of adaptive value.

|                               | Protection against:      |                                  |                                              | Cell mobility           |                    | Resistance to: |                                                    | Protection against exogenous DNA                                                                         |                   |
|-------------------------------|--------------------------|----------------------------------|----------------------------------------------|-------------------------|--------------------|----------------|----------------------------------------------------|----------------------------------------------------------------------------------------------------------|-------------------|
|                               | low temperature          | oxidative stress                 | UV radiation                                 | gas vesicles production | flagella formation | antibiotics    | heavy metals                                       | restriction-modification system                                                                          | CRISPR-Cas system |
| <i>Acinetobacter</i> (16)     | CP019151                 | CP014652<br>CP014653<br>CP019144 |                                              |                         | CP015111           |                | CP019144                                           | CP014652                                                                                                 |                   |
| <i>Aeromonas</i> (4)          |                          |                                  |                                              |                         |                    |                |                                                    |                                                                                                          |                   |
| <i>Aliivibrio</i> (6)         | NC_011311                |                                  |                                              |                         |                    |                |                                                    |                                                                                                          |                   |
| <i>Altererythrobacter</i> (1) |                          | CP011453                         |                                              |                         |                    |                |                                                    |                                                                                                          |                   |
| <i>Alteromonas</i> (1)        |                          | CP013927                         |                                              |                         |                    |                | CP013927                                           |                                                                                                          |                   |
| <i>Arthrobacter</i> (16)      | CP015733                 | CP015735                         | MH067969<br>MH067971<br>MH067976<br>MH067977 |                         |                    |                | MH067969<br>MH067970<br>MH067971<br>MH067977       | CP015733<br>MH067967<br>MH067970<br>MH067971<br>MH067972<br>MH067973<br>MH067974<br>MH067976<br>MH067977 |                   |
| <i>Bacillus</i> (12)          | NZ_CP013056<br>NC_010180 |                                  |                                              |                         |                    |                |                                                    |                                                                                                          |                   |
| <i>Bosea</i> (1)              |                          |                                  |                                              |                         |                    |                |                                                    |                                                                                                          |                   |
| <i>Carnobacterium</i> (7)     |                          |                                  |                                              |                         |                    | NC_022607      | NC_022601<br>NC_022603<br>NC_022607<br>NZ_CP010819 |                                                                                                          |                   |
| <i>Chryseobacterium</i> (2)   |                          |                                  |                                              |                         |                    |                |                                                    |                                                                                                          |                   |
| <i>Cryobacterium</i> (4)      | CP021994                 |                                  |                                              |                         |                    |                | CP016283                                           | CP016284                                                                                                 |                   |
| <i>Desulfotalea</i> (2)       | NC_006139                |                                  |                                              |                         |                    |                |                                                    |                                                                                                          |                   |
| <i>Exiguobacterium</i> (2)    |                          |                                  |                                              |                         |                    |                |                                                    |                                                                                                          |                   |
| <i>Flavobacterium</i> (2)     |                          |                                  |                                              |                         |                    |                |                                                    |                                                                                                          |                   |
| <i>Glaciecola</i> (1)         | CP002527                 |                                  |                                              |                         |                    |                | CP002527                                           |                                                                                                          |                   |
| <i>Halocynthiibacter</i> (1)  |                          | CP014328                         |                                              |                         |                    | CP014328       |                                                    |                                                                                                          |                   |
| <i>Halomonas</i> (2)          |                          |                                  |                                              |                         |                    |                |                                                    |                                                                                                          |                   |
| <i>Moraxella</i> (2)          |                          |                                  |                                              |                         |                    |                |                                                    |                                                                                                          |                   |
| <i>Octadecabacter</i> (4)     | NC_020909<br>NC_020910   |                                  |                                              | NC_020910               | NC_020909          |                |                                                    |                                                                                                          |                   |

|                               |             |                                                          |                                                  |  |           |           |                                                          |                                                                                                  |           |
|-------------------------------|-------------|----------------------------------------------------------|--------------------------------------------------|--|-----------|-----------|----------------------------------------------------------|--------------------------------------------------------------------------------------------------|-----------|
| <i>Paenibacillus</i> (1)      |             |                                                          |                                                  |  |           |           |                                                          |                                                                                                  |           |
| <i>Pedobacter</i> (1)         |             |                                                          |                                                  |  |           |           |                                                          |                                                                                                  |           |
| <i>Photobacterium</i> (1)     |             |                                                          |                                                  |  |           |           |                                                          |                                                                                                  |           |
| <i>Planococcus</i> (24)       |             | CP025124<br>CM009124                                     |                                                  |  |           |           | CM009124<br>CP025124<br>CP025128                         | CP025123                                                                                         |           |
| <i>Planomicrobium</i> (1)     |             |                                                          |                                                  |  |           |           |                                                          |                                                                                                  |           |
| <i>Polaromonas</i> (13)       | MG869625    | MG869617<br>MG869618<br>MG869615<br>MG869620<br>MG869625 | MG869620                                         |  |           |           | MG869617<br>MG869618<br>MG869615<br>MG869616<br>MG869620 |                                                                                                  |           |
| <i>Pseudoalteromonas</i> (11) | NZ_CP013139 |                                                          |                                                  |  |           |           | CP011027                                                 | CP011027                                                                                         |           |
| <i>Pseudomonas</i> (10)       | CP017887    | NC_021212<br>NC_016644<br>CP017887<br>NZ_CP015601        | NC_021212<br>NC_016644<br>NZ_CP015601            |  |           |           |                                                          | CP017887                                                                                         |           |
| <i>Psychrobacter</i> (59)     | CP012708    | NC_019278                                                |                                                  |  | CM009132  | NC_021158 | CM009116<br>CP012534<br>CM009109                         | NC_019274<br>NC_019278<br>CP000324<br>NC_009516<br>NC_021668<br>CP012711<br>CP012534<br>CM009136 |           |
| <i>Psychroflexus</i> (1)      |             |                                                          |                                                  |  |           |           |                                                          |                                                                                                  |           |
| <i>Runella</i> (5)            |             |                                                          |                                                  |  |           |           | NC_015704                                                | NC_015694                                                                                        |           |
| <i>Shewanella</i> (20)        |             | NC_017570<br>NC_017577<br>NC_009035                      | NC_009661<br>NC_009998<br>NC_009999<br>NC_016905 |  | NC_017580 |           | NC_009035                                                | NC_017570<br>NC_017578<br>NC_017580<br>NC_009036<br>NC_011668<br>NC_016905                       |           |
| <i>Sinorhizobium</i> (2)      |             |                                                          |                                                  |  | KU140623  |           | NC_021209<br>KU140623                                    |                                                                                                  |           |
| <i>Sphingopyxis</i> (1)       |             |                                                          |                                                  |  |           |           |                                                          |                                                                                                  |           |
| <i>Streptomyces</i> (4)       | NZ_CP011665 |                                                          |                                                  |  |           | NC_021056 |                                                          |                                                                                                  | NC_021056 |
| <i>Sulfuricella</i> (1)       |             | NC_022358                                                | NC_022358                                        |  |           |           | NC_022358                                                |                                                                                                  |           |
| <i>Variovorax</i> (6)         |             |                                                          |                                                  |  |           |           |                                                          |                                                                                                  |           |

|                               | Metabolism and transport of:                                                     |                                  |             |                      |                                                                      |                         | Energy production and conversion             |
|-------------------------------|----------------------------------------------------------------------------------|----------------------------------|-------------|----------------------|----------------------------------------------------------------------|-------------------------|----------------------------------------------|
|                               | carbohydrates                                                                    | amino acids                      | nucleotides | lipids               | inorganic ions                                                       | toxic organic compounds |                                              |
| <i>Acinetobacter</i> (16)     |                                                                                  | CP014653                         |             |                      | CP014652<br>CP014653<br>CP014655<br>CP015111<br>CP019144<br>CP019145 |                         |                                              |
| <i>Aeromonas</i> (4)          |                                                                                  |                                  |             |                      |                                                                      |                         |                                              |
| <i>Aliivibrio</i> (6)         |                                                                                  |                                  |             |                      |                                                                      |                         |                                              |
| <i>Altererythrobacter</i> (1) | CP011453                                                                         |                                  |             |                      |                                                                      | CP011453                | CP011453                                     |
| <i>Alteromonas</i> (1)        | CP013927                                                                         |                                  |             |                      |                                                                      |                         |                                              |
| <i>Arthrobacter</i> (16)      | MH067967<br>MH067969<br>MH067970<br>MH067971<br>MH067975<br>MH067976<br>MH067977 | MH067970<br>MH067975<br>MH067976 | MH067975    | MH067967<br>MH067969 | MH067971<br>MH067975<br>MH067976<br>MH067977<br>CP015733             | MH067967<br>MH067976    | MH067967<br>MH067971<br>MH067975<br>MH067976 |
| <i>Bacillus</i> (12)          |                                                                                  | NC_010180                        |             |                      |                                                                      |                         |                                              |
| <i>Bosea</i> (1)              | NZ_CP014302                                                                      | NZ_CP014302                      |             |                      |                                                                      |                         |                                              |
| <i>Carnobacterium</i> (7)     | NC_015390                                                                        | NC_015390                        |             |                      |                                                                      |                         |                                              |
| <i>Chryseobacterium</i> (2)   |                                                                                  |                                  |             |                      |                                                                      |                         |                                              |
| <i>Cryobacterium</i> (4)      |                                                                                  |                                  |             |                      | CP016283                                                             |                         |                                              |
| <i>Desulfotalea</i> (2)       |                                                                                  | NC_006139                        |             |                      |                                                                      |                         |                                              |
| <i>Exiguobacterium</i> (2)    |                                                                                  |                                  |             |                      |                                                                      |                         |                                              |

|                               |                                              |                          |           |           |                                  |                       |             |
|-------------------------------|----------------------------------------------|--------------------------|-----------|-----------|----------------------------------|-----------------------|-------------|
| <i>Flavobacterium</i> (2)     |                                              |                          |           |           |                                  |                       |             |
| <i>Glaciecola</i> (1)         |                                              |                          |           |           |                                  |                       | CP002527    |
| <i>Halocynthiibacter</i> (1)  |                                              |                          |           |           |                                  |                       |             |
| <i>Halomonas</i> (2)          |                                              |                          |           |           |                                  |                       |             |
| <i>Moraxella</i> (2)          |                                              |                          |           |           |                                  |                       |             |
| <i>Octadecabacter</i> (4)     | NC_020910<br>NZ_CP012161                     | NC_020910                | NC_020910 | NC_020910 |                                  |                       | NC_020910   |
| <i>Paenibacillus</i> (1)      |                                              |                          |           |           |                                  |                       |             |
| <i>Pedobacter</i> (1)         |                                              |                          |           |           |                                  |                       |             |
| <i>Photobacterium</i> (1)     |                                              |                          |           |           |                                  |                       |             |
| <i>Planococcus</i> (24)       |                                              |                          |           |           |                                  |                       | CM009142    |
| <i>Planomicrobium</i> (1)     |                                              |                          |           |           |                                  |                       |             |
| <i>Polaromonas</i> (13)       | MG869615<br>MG869617<br>MG869616<br>MG869625 | MG869615<br>MG869625     |           | MG869620  | MG869616                         | MG869617              |             |
| <i>Pseudoalteromonas</i> (11) |                                              |                          |           |           |                                  |                       | NC_015708   |
| <i>Pseudomonas</i> (10)       | NZ_CP015601                                  |                          |           |           | CP017887<br>NZ_CP015601          | NC_016644<br>CP017887 | NZ_CP015601 |
| <i>Psychrobacter</i> (59)     |                                              |                          |           |           | CM009139<br>CP022042<br>CM009133 |                       |             |
| <i>Psychroflexus</i> (1)      |                                              |                          |           |           |                                  |                       |             |
| <i>Runella</i> (5)            |                                              |                          |           |           |                                  |                       | NC_015693   |
| <i>Shewanella</i> (20)        | NC_009035                                    | NC_009035<br>NZ_CM009684 |           |           | NC_009035                        |                       | NC_009035   |
| <i>Sinorhizobium</i> (2)      | KU140623                                     | KU140623                 | KU140623  | KU140623  | KU140623                         |                       | KU140623    |
| <i>Sphingopyxis</i> (1)       |                                              |                          |           |           |                                  |                       | NC_008036   |
| <i>Streptomyces</i> (4)       |                                              |                          |           |           |                                  |                       |             |
| <i>Sulfuricella</i> (1)       |                                              |                          |           |           |                                  |                       |             |
| <i>Variovorax</i> (6)         |                                              |                          |           |           |                                  |                       |             |

Accession numbers of plasmids identified and characterized in this study are bolded.

In parentheses numbers of plasmids found in cold-active representatives of a particular taxonomic group are indicated.

### Descriptions of plasmids presented in the table:

CP015111 – plasmid unnamed1 (298,877 bp, *Acinetobacter* sp. TGL-Y2);  
 CP019144 – pmZS (198,391 bp, *Acinetobacter lwoffii* ZS207);  
 CP019145 – pZS-3 (13,816 bp, *Acinetobacter lwoffii* ZS207);  
 CP019151 – pZS-13 (6,168 bp, *Acinetobacter lwoffii* ZS207);  
 CP014652 – plasmid unnamed1 (141,965 bp, *Acinetobacter* sp. DUT-2);  
 CP014653 – plasmid unnamed2 (50,047 bp, *Acinetobacter* sp. DUT-2);  
 CP014655 – plasmid unnamed4 (11,158 bp, *Acinetobacter* sp. DUT-2);  
 CP015111 – plasmid unnamed1 (298,877 bp, *Acinetobacter* sp. TGL-Y2);  
 NC\_011311 – pVSAL840 (83,540 bp, *Aliivibrio salmonicida* LFI1238);  
 CP011453 – plasmid unnamed (88,815 bp, *Altererythrobacter atlanticus* 26DY36);  
 CP013927 – pASTE61-200 (252,173 bp, *Alteromonas stellipolaris* LMG 21861);  
 CP015733 – plasmid unnamed1 (178,569 bp, *Arthrobacter* sp. U41);  
 CP015734 – plasmid unnamed2 (166,444 bp, *Arthrobacter* sp. U41);  
 CP015735 – plasmid unnamed3 (61,249 bp, *Arthrobacter* sp. U41);  
 NZ\_CP013056 – pYWC2-8-1 (250,706 bp, *Bacillus thuringiensis* YWC2-8);  
 NC\_010180 – pBWB401 (417,054 bp, *Bacillus weihenstephanensis* KBAB4);  
 NZ\_CP014302 – plasmid (7,199 bp, *Bosea* sp. PAMC 26642);  
 NC\_022607 – pWNCR15 (15,475 bp, *Carnobacterium inhibens* subsp. *gilichinskyi* WN1359);  
 NC\_022601 – pWNCR12 (12,655 bp, *Carnobacterium inhibens* subsp. *gilichinskyi* WN1359);  
 NC\_022603 – pWNCR64 (64,491 bp, *Carnobacterium inhibens* subsp. *gilichinskyi* WN1359);  
 NZ\_CP010819 – pCP1 (8,883 bp, *Carnobacterium* sp. CP1);

NC\_015390 – pCAR50 (50,105 bp, *Carnobacterium* sp. 17-4);  
CP016283 – pP27867\_1 (117,792 bp; *Cryobacterium arcticum* PAMC 27867);  
CP016284 – pP27867\_2 (58,936 bp, *Cryobacterium arcticum* PAMC 27867);  
CP021994 – plasmid unnamed1 (169,719 bp, *Cryobacterium* sp. LW097);  
NC\_006139 – plasmid large (121,587 bp, *Desulfotalea psychrophila* LSv54);  
CP002527 – pGLAAG01 (341,282 bp, *Glaciacola* sp. 4H-3-7+YE-5);  
CP014328 – plasmid (46,566 bp, *Halocynthiibacter arcticus* PAMC 20958);  
NC\_020909 – pOA238\_118 (118,287 bp, *Octadecabacter arcticus* 238);  
NC\_020910 – pOA238\_160 (159,683 bp, *Octadecabacter arcticus* 238);  
NZ\_CP012161 – plasmid PSB\_p1 (31,560 bp, *Octadecabacter temperatus* SB1);  
CM009124 – plasmid unnamed1 (70,671 bp, *Planococcus* sp. MB-3u-09);  
CP025124 – plasmid unnamed1 (70,808 bp, *Planococcus* sp. MB-3u-03);  
CP025128 – plasmid unnamed6 (5,115 bp, *Planococcus* sp. MB-3u-03);  
CP025123 – plasmid unnamed12 (129,321 bp, *Planococcus* sp. MB-3u-03);  
CM009142 – plasmid unnamed1 (152,323 bp, *Planococcus* sp. MB-3u-03);  
MG869615 – pE10SP1 (86,294 bp, *Polaromonas* sp. E10S);  
MG869616 – pE19SP1 (18,920 bp; *Polaromonas* sp. E19S);  
MG869617 – pE3SP1 (101,077 bp, *Polaromonas* sp. E3S);  
MG869618 – pE5SP1 (65,477 bp, *Polaromonas* sp. E5S);  
MG869620 – pH6NP1 (82,545 bp, *Polaromonas* sp. H6N);  
MG869625 – pW11NP2 (52,468 bp, *Polaromonas* sp. W11N);  
NZ\_CP013139 – pPBSW1 (906,103 bp, *Pseudoalteromonas* sp. Bsw20308);  
CP011027 – plasmid unnamed (91,261 bp, *Pseudoalteromonas arctica* A 37-1-2)  
NZ\_CP015601 – pP27494\_1 (135,475 bp, *Pseudomonas antarctica* PAMC 27494);  
NC\_015708 – pTML1 (97,600 bp, *Pseudoalteromonas* sp. SANK 73390);  
NC\_021212 – pGLE121P3 (39,583 bp, *Pseudomonas* sp. GLE121);  
NC\_016644 – plasmid KOPRI126573 (81,814 bp, *Pseudomonas* sp. MC1);  
CP017887 – plasmid unnamed1 (371,069 bp, *Pseudomonas frederiksbergensis* ERDD5:01);  
NC\_019278 – pP60P2 (14,924 bp, *Psychrobacter* sp. DAB\_AL60);  
CM009132 – plasmid unnamed1 (14,711 bp, *Psychrobacter* sp. MES7-P7E);  
NC\_021158 – pKLH80 (14,835 bp, *Psychrobacter maritimus* MR29-12);  
CM009116 – plasmid unnamed2 (59,859 bp, *Psychrobacter* sp. 4Dc);  
CP012534 – pPspP11G5a (40,963 bp, *Psychrobacter* sp. P11G5);  
CP012708 – plasmid 2 (15,605 bp, *Psychrobacter urativorans* R10.10B);  
CP000324 – plasmid 1 (41,221 bp, *Psychrobacter cryohalolentis* K5);  
CM009109 – plasmid unnamed1 (20,934 bp, *Psychrobacter* sp. 4Bb);  
NC\_019274 – pP62BP1 (34,467 bp, *Psychrobacter* sp. DAB\_AL62B);  
NC\_009516 – pRWF101 (13,956 bp, *Psychrobacter* sp. PRwf-1);  
NC\_021668 – plasmid PsyG\_26 (26,087 bp, *Psychrobacter* sp. G);  
CP012711 – plasmid 5 (49,020 bp, *Psychrobacter urativorans* R10.10B);  
CP022042 – plasmid unnamed1 (41,221 bp, *Psychrobacter cryohalolentis* FDAARGOS\_308);  
CM009133 – plasmid unnamed3 (7,765 bp, *Psychrobacter* sp. MES7-P7E);  
CM009136 – plasmid unnamed1 (11,462 bp, *Psychrobacter* sp. Sarcosine-02u-2);  
CM009139 – plasmid unnamed4 (6,971 bp, *Psychrobacter* sp. Sarcosine-02u-2);  
NC\_015693 – pRUNSL01 (106,999 bp, *Runella slithyformis* DSM 19594);  
NC\_015704 – pRUNSL02 (93,527 bp, *Runella slithyformis* DSM 19594);  
NC\_015694 – pRUNSL03 (66,926 bp, *Runella slithyformis* DSM 19594);  
NC\_017570 – pSBAL17501 (72392 bp, *Shewanella baltica* BA175);  
NC\_017577 – pSBAL1701 (120,153 bp, *Shewanella baltica* OS117);

NC\_017580 – pSBAL11702 (91,728 bp, *Shewanella baltica* OS117);  
NC\_017578 – pSBAL11703 (71,173 bp, *Shewanella baltica* OS117);  
NC\_009035 – pSbal01 (116,763 bp, *Shewanella baltica* OS155);  
NC\_009036 – pSbal02 (74,000 bp, *Shewanella baltica* OS155);  
NC\_009661 – pS18501 (83,224 bp, *Shewanella baltica* OS155);  
NC\_009998 – pS19501 (75,605 bp, *Shewanella baltica* OS195);  
NC\_009999 – pS19502 (75,508 bp, *Shewanella baltica* OS195);  
NC\_011668 – pS22302 (65,448 bp, *Shewanella baltica* OS223);  
NC\_016905 – pSBAL67801 (80,698 bp, *Shewanella baltica* OS678);  
NZ\_CM009684 – pWMBT7 (113,604 bp, *Shewanella morhuae* CW7);  
KU140623 – pSinB (297,376 bp, *Sinorhizobium* sp. M14);  
NC\_021209 – pSinA (108,938 bp, *Sinorhizobium* sp. M14);  
NC\_008036 – plasmid F (28,543 bp, *Sphingopyxis alaskensis* RB2256);  
NZ\_CP011665 – pSMg1-1 (529,571 bp, *Streptomyces* sp. Mg1);  
NC\_021056 – pSP01 (104,048 bp, *Streptomyces* sp. PAMC26508);  
NC\_022358 – pSCD (86,619 bp, *Sulfuricella denitricans* skB26).
